# Supplementary material for: Genes Involved in Systemic and Arterial Bed Dependent Atherosclerosis - Tampere Vascular Study
Source: PLoS One. 2012 Apr 11;7(4):e33787. doi: 10.1371/journal.pone.0033787 (PMC3324479; doi:10.1371/journal.pone.0033787)
Supplement: Table S6 — Significantly up-regulated genes in human advanced atherosclerotic carotid artery. (XLS) [file pone.0033787.s006.xls]

## Sheet: Sheet1
Symbol	Accession	Average_Carotid artery	Average_control (ITA)	foldchange_Carotid artery	ProbeId	Transcript	Start	Probe_Sequence	Definition											Ontology
SPP1	NM_000582.2	17204.2	252.2	68.22	4850685	GI_38146097	806	GTCAGCTGGATGACCAGAGTGCTGAAACCCACAGCCACAAGCAGTCCAGA	Homo sapiens secreted phosphoprotein 1 (osteopontin, bone sialoprotein I, early T-lymphocyte activation 1) (SPP1), mRNA.											go_component: extracellular matrix [goid 0005578] [evidence E]; go_process: ossification [goid 0001503] [evidence E]; go_process: skeletal development [goid 0001501] [evidence NR]
CCL18	NM_002988.2	9405.11	213.45	44.06	1990273	GI_22547150	414	CCCTGGAGGCCACCTCTTCTAAGAGTCCCATCTGCTATGCCCAGCCACAT	Homo sapiens chemokine (C-C motif) ligand 18 (pulmonary and activation-regulated) (CCL18), mRNA.											go_component: extracellular [goid 0005576] [evidence IEA]; go_function: chemokine activity [goid 0008009] [evidence TAS] [pmid 9192897]; go_process: response to biotic stimulus [goid 0009607] [evidence TAS] [pmid 9233607]; go_process: chemotaxis [goid 0006935] [evidence TAS] [pmid 9192897]; go_process: signal transduction [goid 0007165] [evidence TAS] [pmid 9233607]; go_process: cell communicatio…
APOC1	NM_001645.2	5208.46	152.68	34.11	2570398	GI_5174774	174	TGGAAACACACTGGAGGACAAGGCTCGGGAACTCATCAGCCGCATCAAAC	Homo sapiens apolipoprotein C-I (APOC1), mRNA.											go_component: extracellular [goid 0005576] [evidence IEA]; go_function: lipid transporter activity [goid 0005319] [evidence IEA]; go_process: lipid metabolism [goid 0006629] [evidence TAS] [pmid 2897845]; go_process: lipid transport [goid 0006869] [evidence IEA]; go_process: lipoprotein metabolism [goid 0042157] [evidence IEA]
MMP9	NM_004994.1	7897.19	234.03	33.74	5050687	GI_4826835	2049	GCTTCTACTGGCGCGTGAGTTCCCGGAGTGAGTTGAACCAGGTGGACCAA	Homo sapiens matrix metalloproteinase 9 (gelatinase B, 92kDa gelatinase, 92kDa type IV collagenase) (MMP9), mRNA.											go_component: extracellular matrix [goid 0005578] [evidence IEA]; go_component: extracellular space [goid 0005615] [evidence TAS] [pmid 2551898]; go_function: collagenase activity [goid 0008133] [evidence TAS] [pmid 2551898]; go_function: zinc ion binding [goid 0008270] [evidence TAS] [pmid 2551898]; go_function: gelatinase B activity [goid 0004229] [evidence IEA]; go_function: hydrolase activity…
LOC387908	XM_370714.2	5378.18	169.86	31.66	6520706	GI_42660142	74	TTCGCGGAGAGTCGTCGGGGTTTCCTGCTTCAACAGTGCTTGGACGGAAC	Homo sapiens similar to Ferritin heavy chain (Ferritin H subunit) (LOC387908), mRNA.
APOE	NM_000041.1	11081.7	356.4	31.09	1090075	GI_4557324	883	TTCCAGGCCCGCCTCAAGAGCTGGTTCGAGCCCCTGGTGGAAGACATGCA	Homo sapiens apolipoprotein E (APOE), mRNA.											go_function: lipid transporter activity [goid 0005319] [evidence NR]; go_function: plasma protein [goid 0005209] [evidence NR]; go_function: receptor binding [goid 0005102] [evidence TAS] [pmid 9218423]; go_function: heparin binding [goid 0008201] [evidence IEA]; go_function: lipid binding [goid 0008289] [evidence IEA]; go_process: cholesterol metabolism [goid 0008203] [evidence TAS] [pmid 921842…
LOC115281	XM_036448.7	3036.8	120.25	25.25	4670300	GI_37546969	95	TAATGACACAGTCTCCAGCCACCCTGTCTTTGTCTCCAGGGGAAAGAGCC	Homo sapiens similar to Ig kappa variable region (LOC115281), mRNA.
ACP5	NM_001611.2	4544.21	192.32	23.63	3840369	GI_6138970	1282	GTTATGCTCTGTGGCTGGCTCACCTTTGCTGAGTTCCGGGGTGCAATGGG	Homo sapiens acid phosphatase 5, tartrate resistant (ACP5), mRNA.											go_component: integral to membrane [goid 0016021] [evidence TAS] [pmid 2338077]; go_component: lysosome [goid 0005764] [evidence IEA]; go_function: acid phosphatase activity [goid 0003993] [evidence TAS] [pmid 8359686]; go_function: hydrolase activity [goid 0016787] [evidence IEA]
HMOX1	NM_002133.1	3492.93	172.61	20.24	6180100	GI_4504436	1435	GTTTTTATAGCAGGGTTGGGGTGGTTTTTGAGCCATGCGTGGGTGGGGAG	Homo sapiens heme oxygenase (decycling) 1 (HMOX1), mRNA.											go_component: microsome [goid 0005792] [evidence IEA]; go_component: membrane fraction [goid 0005624] [evidence TAS] [pmid 3345742]; go_component: endoplasmic reticulum [goid 0005783] [evidence TAS] [pmid 3345742]; go_function: heme oxygenase (decyclizing) activity [goid 0004392] [evidence TAS] [pmid 9884342]; go_function: oxidoreductase activity [goid 0016491] [evidence IEA]; go_process: heme ox…
LGALS3	NM_002306.1	1408.16	105.89	13.3	6200184	GI_4504982	13	CGGAAAATGGCAGACAATTTTTCGCTCCATGATGCGTTATCTGGGTCTGG	Homo sapiens lectin, galactoside-binding, soluble, 3 (galectin 3) (LGALS3), mRNA.											go_component: nucleus [goid 0005634] [evidence IEA]; go_component: extracellular [goid 0005576] [evidence NR]; go_component: plasma membrane [goid 0005886] [evidence TAS] [pmid 9162064]; go_function: lectin [goid 0005530] [evidence TAS] [pmid 9162064]; go_function: galactose binding lectin [goid 0005531] [evidence IEA]; go_function: IgE binding [goid 0019863] [evidence IEA]; go_function: sugar bi…
IFI30	NM_006332.3	7596.93	642.63	11.82	6450279	GI_29826337	797	AGCTCCCTCAGGAGTGTTTGCTTCAAGTGATGGCCGGTGAGCTGCGGAGA	Homo sapiens interferon, gamma-inducible protein 30 (IFI30), mRNA.											go_component: lysosome [goid 0005764] [evidence TAS] [pmid 3136170]; go_component: extracellular [goid 0005576] [evidence TAS] [pmid 3136170]; go_function: oxidoreductase activity [goid 0016491] [evidence IEA]; go_process: immune response [goid 0006955] [evidence IEA]
IGJ	NM_144646.2	2288.78	219.06	10.45	2120066	GI_32189367	481	GGTGAGACCAAAATGGTGGAAACAGCCTTAACCCCAGATGCCTGCTATCC	Homo sapiens immunoglobulin J polypeptide, linker protein for immunoglobulin alpha and mu polypeptides (IGJ), mRNA.											go_component: extracellular [goid 0005576] [evidence NAS] [pmid 2984306]; go_function: antigen binding [goid 0003823] [evidence NAS] [pmid 2984306]; go_process: immune response [goid 0006955] [evidence NAS] [pmid 2984306]
MMP7	NM_002423.2	1168.99	116.74	10.01	1400605	GI_13027804	615	GCTCACTTCGATGAGGATGAACGCTGGACGGATGGTAGCAGTCTAGGGAT	Homo sapiens matrix metalloproteinase 7 (matrilysin, uterine) (MMP7), mRNA.											go_component: extracellular matrix [goid 0005578] [evidence IEA]; go_component: extracellular space [goid 0005615] [evidence TAS] [pmid 1497627]; go_function: metalloendopeptidase activity [goid 0004222] [evidence P] [pmid 1497627]; go_function: zinc ion binding [goid 0008270] [evidence IEA]; go_function: matrilysin activity [goid 0004235] [evidence IEA]; go_function: hydrolase activity [goid 001…
LYZ	NM_000239.1	1445.44	144.55	10	610647	GI_4557893	346	CGCTGATGCTGTAGCTTGTGCAAAGAGGGTTGTCCGTGATCCACAAGGCA	Homo sapiens lysozyme (renal amyloidosis) (LYZ), mRNA.											go_component: extracellular space [goid 0005615] [evidence TAS] [pmid 2829884]; go_function: lysozyme activity [goid 0003796] [evidence TAS] [pmid 2829884]; go_function: amyloid protein [goid 0005208] [evidence TAS] [pmid 8464497]; go_function: lysin activity [goid 0015465] [evidence NR]; go_function: structural molecule activity [goid 0005198] [evidence IEA]; go_function: bacteriolytic toxin act…
CFL1	NM_005507.1	1925.12	194.63	9.89	580292	GI_5031634	456	GCAAGCAAACTGCTACGAGGAGGTCAAGGACCGCTGCACCCTGGCAGAGA	Homo sapiens cofilin 1 (non-muscle) (CFL1), mRNA.											go_component: cytoskeleton [goid 0005856] [evidence IEA]; go_component: nucleus [goid 0005634] [evidence TAS] [pmid 8195165]; go_function: actin modulating activity [goid 0003790] [evidence NR]; go_function: actin binding [goid 0003779] [evidence NR]; go_process: Rho protein signal transduction [goid 0007266] [evidence TAS] [pmid 10436159]; go_process: actin cytoskeleton reorganization [goid 0007…
HLA-DRB3	NM_022555.3	5935.69	603.49	9.84	2340239	GI_18641371	901	TCCCGCCTGGCTGTTATTCTTCCACGAGAGAGGGCTTTCTCAGGACCTAG	Homo sapiens major histocompatibility complex, class II, DR beta 3 (HLA-DRB3), mRNA.											go_component: integral to plasma membrane [goid 0005887] [evidence NR]; go_function: class II major histocompatibility complex antigen [goid 0003821] [evidence NR]; go_process: signal transduction [goid 0007165] [evidence NR]
SLAMF8	NM_020125.1	1640.47	171.53	9.56	2320288	GI_9910341	2817	GCAGCTCTCCCTCCACAAGGTGACTCTTAGCAACCTCATTTCGACAGTGG	Homo sapiens SLAM family member 8 (SLAMF8), mRNA.
FABP5	NM_001444.1	2446.13	262.26	9.33	1170400	GI_4557580	385	GATGGGAAATTAGTGGTGGAGTGTGTCATGAACAATGTCACCTGTACTCG	Homo sapiens fatty acid binding protein 5 (psoriasis-associated) (FABP5), mRNA.											go_component: cytoplasm [goid 0005737] [evidence NR]; go_function: lipid binding [goid 0008289] [evidence P] [pmid 1512466]; go_function: fatty acid binding [goid 0005504] [evidence TAS] [pmid 8092987]; go_function: transporter activity [goid 0005215] [evidence IEA]; go_process: epidermal differentiation [goid 0008544] [evidence TAS] [pmid 1512466]; go_process: lipid metabolism [goid 0006629] [ev…
CAPG	NM_001747.1	3017.03	329.77	9.15	4200402	GI_4502560	990	AGGGCTTCATCTCGCGCATGCAGTACGCCCCGAACACTCAGGTGGAGATT	Homo sapiens capping protein (actin filament), gelsolin-like (CAPG), mRNA.											go_component: F-actin capping protein complex [goid 0008290] [evidence TAS] [pmid 1322908]; go_component: nucleus [goid 0005634] [evidence IEA]; go_component: actin cytoskeleton [goid 0015629] [evidence NR]; go_function: barbed-end actin capping activity [goid 0003783] [evidence TAS] [pmid 1322908]; go_function: actin binding [goid 0003779] [evidence IEA]; go_process: response to pest/pathogen/pa…
CTSZ	NM_001336.2	3987.75	440.44	9.05	6550519	GI_22538441	1276	GTGACCTGCAACACAGGAAACGATGGGACCTCAGTCTTCTTCAGCAGAGG	Homo sapiens cathepsin Z (CTSZ), mRNA.											go_component: lysosome [goid 0005764] [evidence IEA]; go_function: cysteine-type peptidase activity [goid 0008234] [evidence E] [pmid 9642240]; go_function: cysteine-type endopeptidase activity [goid 0004197] [evidence IEA]; go_function: hydrolase activity [goid 0016787] [evidence IEA]; go_process: proteolysis and peptidolysis [goid 0006508] [evidence TAS] [pmid 9642240]; go_process: oncogenesis …
IL4I1	NM_152899.1	1164.2	133.46	8.72	2900731	GI_23821022	1713	AGGCAGCCACCCTCCAGTCCAAGGCCAGTTATCTCTCCAAAACACGACCC	Homo sapiens interleukin 4 induced 1 (IL4I1), transcript variant 1, mRNA.											go_function: amine oxidase (flavin-containing) activity [goid 0004041] [evidence IEA]; go_function: oxidoreductase activity [goid 0016491] [evidence IEA]; go_process: electron transport [goid 0006118] [evidence IEA]
THBS1	NM_003246.2	2082.78	239.62	8.69	4480278	GI_40317625	5080	GAGGTCTTCAATACTGTTTTACCCCATCCCTTGTGCATATTTCCAGGGAG	Homo sapiens thrombospondin 1 (THBS1), mRNA.											go_component: extracellular matrix [goid 0005578] [evidence NR]; go_component: extracellular space [goid 0005615] [evidence NR]; go_function: endopeptidase inhibitor activity [goid 0004866] [evidence TAS] [pmid 8751720]; go_function: signal transducer activity [goid 0004871] [evidence TAS] [pmid 8751720]; go_function: cell adhesion molecule activity [goid 0005194] [evidence IEA]; go_function: hep…
ECGF1	NM_001953.2	5135.3	597.91	8.59	5860066	GI_7669488	1550	TTCGCAGAGCTCGTTCTGCCGCCGCAGCAATAAAGCTCCTTTGCCGCGAA	Homo sapiens endothelial cell growth factor 1 (platelet-derived) (ECGF1), mRNA.											go_component: soluble fraction [goid 0005625] [evidence NR]; go_component: extracellular space [goid 0005615] [evidence NR]; go_function: thymidine phosphorylase activity [goid 0009032] [evidence TAS] [pmid 9924029]; go_function: platelet-derived growth factor receptor binding [goid 0005161] [evidence TAS] [pmid 2005900]; go_function: growth factor activity [goid 0008083] [evidence IEA]; go_funct…
MMP12	NM_002426.1	955.49	116.45	8.2	780193	GI_4505206	1243	GACCCTGGTTATCCCAAACTGATTACCAAGAACTTCCAAGGAATCGGGCC	Homo sapiens matrix metalloproteinase 12 (macrophage elastase) (MMP12), mRNA.											go_component: extracellular matrix [goid 0005578] [evidence NR]; go_function: macrophage elastase activity [goid 0004234] [evidence TAS] [pmid 8226919]; go_function: zinc ion binding [goid 0008270] [evidence TAS] [pmid 8226919]; go_function: hydrolase activity [goid 0016787] [evidence IEA]; go_function: calcium ion binding [goid 0005509] [evidence IEA]; go_process: proteolysis and peptidolysis [g…
LIPA	NM_000235.1	3253.43	402.94	8.07	4060068	GI_4557720	2079	CCCGCTACTGTCGTTATTGATCACATCTGTGTGAAGCCAAAGCCCCGTGG	Homo sapiens lipase A, lysosomal acid, cholesterol esterase (Wolman disease) (LIPA), mRNA.											go_component: lysosome [goid 0005764] [evidence TAS] [pmid 1718995]; go_function: lipoprotein lipase activity [goid 0004465] [evidence NR]; go_function: hydrolase activity [goid 0016787] [evidence IEA]; go_function: sterol esterase activity [goid 0004771] [evidence IEA]; go_process: N-linked glycosylation [goid 0006487] [evidence TAS] [pmid 1718995]; go_process: lipid catabolism [goid 0016042] [e…
CTSB	NM_001908.2	12928	1618.49	7.99	2030408	GI_22538429	1518	CAGGATGAAAGTTCCCCCATCAGTTCCCCCAGTACCTCCAAGCAAGTAGC	Homo sapiens cathepsin B (CTSB), transcript variant 1, mRNA.											go_component: lysosome [goid 0005764] [evidence NR]; go_component: intracellular [goid 0005622] [evidence TAS] [pmid 1645961]; go_function: cathepsin B activity [goid 0004213] [evidence TAS] [pmid 1645961]; go_function: hydrolase activity [goid 0016787] [evidence IEA]; go_process: proteolysis and peptidolysis [goid 0006508] [evidence TAS] [pmid 3463996]
CYBA	NM_000101.1	3660.61	459.81	7.96	4570280	GI_4557504	373	CATTGCGAGCGGCATCTACCTACTGGCGGCTGTGCGTGGCGAGCAGTGGA	Homo sapiens cytochrome b-245, alpha polypeptide (CYBA), mRNA.											go_component: membrane [goid 0016020] [evidence NR]; go_component: mitochondrion [goid 0005739] [evidence NR]; go_function: cytochrome b [goid 0009460] [evidence TAS] [pmid 2243141]; go_function: oxidoreductase activity [goid 0016491] [evidence IEA]; go_function: electron transporter activity [goid 0005489] [evidence TAS]; go_process: superoxide metabolism [goid 0006801] [evidence NR]; go_process…
CTSD	NM_001909.3	3860.12	485.56	7.95	60008	GI_23110949	1961	ACTGAGCCAGTCCCAGGGGCATGTATTGGCCTGGAGGTGGGGTTGGGATT	Homo sapiens cathepsin D (lysosomal aspartyl protease) (CTSD), mRNA.											go_component: lysosome [goid 0005764] [evidence NR]; go_function: cathepsin D activity [goid 0004192] [evidence TAS] [pmid 3927292]; go_function: pepsin A activity [goid 0004194] [evidence IEA]; go_function: hydrolase activity [goid 0016787] [evidence IEA]; go_process: proteolysis and peptidolysis [goid 0006508] [evidence IEA]
KIAA1199	NM_018689.1	969.14	131.54	7.37	4570500	GI_38638697	6882	GCAACGCTCCTCTGAAATGCTTGTCTTTTTTCTGTTGCCGAAATAGCTGG	Homo sapiens KIAA1199 protein (KIAA1199), mRNA.
ADFP	NM_001122.2	2971.13	404.58	7.34	3170408	GI_34577058	1495	CCTGCCCCTATCACTAGTGCATGCTGTGGCCAGACAGATGACACCTTTTG	Homo sapiens adipose differentiation-related protein (ADFP), mRNA.											go_component: lipid particle [goid 0005811] [evidence TAS] [pmid 9003395]; go_component: extracellular [goid 0005576] [evidence TAS] [pmid 9003395]; go_component: endoplasmic reticulum [goid 0005783] [evidence TAS] [pmid 9003395]; go_component: membrane [goid 0016020] [evidence IEA]
TREM2	NM_018965.1	1477.52	204.12	7.24	380706	GI_9507202	885	CTGGCAAGAGACTACTCTGCCTGAACACTGCTTCTCCTGGACCCTGGAAG	Homo sapiens triggering receptor expressed on myeloid cells 2 (TREM2), mRNA.											go_function: receptor activity [goid 0004872] [evidence P] [pmid 10799849]; go_process: humoral immune response [goid 0006959] [evidence P] [pmid 10799849]
PLA2G7	NM_005084.2	882.84	123.44	7.15	6220070	GI_31543409	1109	GGATGTTTCCACTGGGTGATGAAGTATATTCCAGAATTCCTCAGCCCCTC	Homo sapiens phospholipase A2, group VII (platelet-activating factor acetylhydrolase, plasma) (PLA2G7), mRNA.											go_component: 2-acetyl-1-alkylglycerophosphocholine esterase complex [goid 0008247] [evidence IEA]; go_component: extracellular [goid 0005576] [evidence TAS] [pmid 8675689]; go_function: phospholipid binding [goid 0005543] [evidence TAS] [pmid 8675689]; go_function: 1-alkyl-2-acetylglycerophosphocholine esterase activity [goid 0003847] [evidence IEA]; go_function: hydrolase activity [goid 0016787…
HLA-DQA1	NM_002122.2	6687.64	937.19	7.14	6220735	GI_18426974	892	CTCTCACCTTTTCTCTGGGACTTAAGCTGCTATATCCCCTCAGAGCTCAC	Homo sapiens major histocompatibility complex, class II, DQ alpha 1 (HLA-DQA1), mRNA.											go_component: integral to membrane [goid 0016021] [evidence IEA]; go_function: class II major histocompatibility complex antigen [goid 0003821] [evidence TAS] [pmid 2300572]; go_function: MHC class II receptor activity [goid 0045012] [evidence TAS]; go_process: pathogenesis [goid 0009405] [evidence TAS] [pmid 2300572]; go_process: immune response [goid 0006955] [evidence IEA]; go_process: antigen…
ITGAX	NM_000887.3	1697.17	245.54	6.91	1500086	GI_34452172	4270	TCAGCTCAGGGCTTCATCGTGGGGCTCTCAGTTCCGATTTCCCAGGCTGA	Homo sapiens integrin, alpha X (antigen CD11C (p150), alpha polypeptide) (ITGAX), mRNA.											go_component: integrin complex [goid 0008305] [evidence TAS] [pmid 2303426]; go_component: integral to membrane [goid 0016021] [evidence IEA]; go_function: cell adhesion receptor activity [goid 0004895] [evidence TAS] [pmid 3327687]; go_function: receptor activity [goid 0004872] [evidence TAS] [pmid 2303426]; go_function: magnesium ion binding [goid 0000287] [evidence IEA]; go_process: histogenes…
PACAP	NM_016459.2	1327.4	197.02	6.74	50672	GI_24475968	855	GGTGGGAGTCAACGCCTTCCCCTCTGGACTCAAATAAAACCCAGTGACCT	Homo sapiens proapoptotic caspase adaptor protein (PACAP), mRNA.
VCAM1	NM_080682.1	2596.96	403.45	6.44	940014	GI_18201908	2642	GGTATAATGGTTGACTGGGTTTCTCTGTATAGTACTGGCATGGTACGGAG	Homo sapiens vascular cell adhesion molecule 1 (VCAM1), transcript variant 2, mRNA.											go_component: integral to membrane [goid 0016021] [evidence IEA]; go_component: plasma membrane [goid 0005886] [evidence NR]; go_function: cell adhesion molecule activity [goid 0005194] [evidence IEA]; go_process: cell-cell adhesion [goid 0016337] [evidence IEA]
DKFZp686O1689	NM_182608.2	1172.53	182.59	6.42	4850451	GI_40255267	1654	GAGTGCCTCCGGCCTCCCCATCCACCTCTGCCTAAGTAAATCTGCTCTCA	Homo sapiens hypothetical protein DKFZp686O1689 (DKFZp686O1689), mRNA.
HAVCR2	NM_032782.2	1812.63	285.55	6.35	1240717	GI_21314757	2204	GACGGTATAGGCTTGATCTGTCTTGCTTATTGTTGCCCCCTGCGCCTAGC	Homo sapiens hepatitis A virus cellular receptor 2 (HAVCR2), mRNA.
CCR1	NM_001295.1	2194.04	357.96	6.13	1400358	GI_4502630	2087	AGCCTTCTGGTTTTATGGGTCAGAGTTCCGACTGCCATCTTGGACTTGTC	Homo sapiens chemokine (C-C motif) receptor 1 (CCR1), mRNA.											go_component: integral to plasma membrane [goid 0005887] [evidence TAS] [pmid 7505609]; go_component: plasma membrane [goid 0005886] [evidence E] [pmid 7505609]; go_function: chemokine receptor activity [goid 0004950] [evidence E]; go_function: C-C chemokine receptor activity [goid 0016493] [evidence IEA]; go_function: rhodopsin-like receptor activity [goid 0001584] [evidence IEA]; go_process: cy…
LOC374572	XM_350946.1	6523.81	1071.32	6.09	5900403	GI_37546026	2468	TCAATGTGTCTGTTGTCATGGCGGAGGCGGATGGCACCTGCTACTGAGCC	Homo sapiens similar to hypothetical protein (LOC374572), mRNA.
CECR1	NM_177405.1	2255.79	372.37	6.06	2810292	GI_29029551	2825	CACTGTCTCAGAGAGGTTTTCCTGTGCTCGCCCTGTTTCTCTCAGGAAGC	Homo sapiens cat eye syndrome chromosome region, candidate 1 (CECR1), transcript variant 2, mRNA.											go_component: cellular_component unknown [goid 0008372] [evidence ND]; go_function: growth factor activity [goid 0008083] [evidence NAS] [pmid 10756095]; go_function: hydrolase activity [goid 0016787] [evidence IEA]; go_function: hydrolase activity, acting on carbon-nitrogen (but not peptide) bonds, in cyclic amidines [goid 0016814] [evidence IEA]; go_process: nucleotide metabolism [goid 0009117]…
TYROBP	NM_198125.1	9437.08	1563.73	6.03	2940438	GI_38158004	198	ATGGGAGACCTGGTGCTGACAGTGCTCATTGCCCTGGCCGTGTACTTCCT	Homo sapiens TYRO protein tyrosine kinase binding protein (TYROBP), transcript variant 2, mRNA.											go_component: integral to plasma membrane [goid 0005887] [evidence TAS] [pmid 9490415]; go_function: receptor signaling protein activity [goid 0005057] [evidence TAS] [pmid 9490415]; go_process: cellular defense response [goid 0006968] [evidence TAS] [pmid 9490415]; go_process: signal transduction [goid 0007165] [evidence E] [pmid 9490415]; go_process: intracellular signaling cascade [goid 000724…
HS3ST2	NM_006043.1	760.6	126.15	6.03	1570632	GI_5174462	1681	GAGAGATTGCAAAGCTGAAAGCACCTCCGGCCACTCCTGGGAGACAGACC	Homo sapiens heparan sulfate (glucosamine) 3-O-sulfotransferase 2 (HS3ST2), mRNA.											go_component: integral to membrane [goid 0016021] [evidence TAS] [pmid 9988767]; go_function: sulfotransferase activity [goid 0008146] [evidence E] [pmid 9988767]; go_function: heparin-glucosamine 3-O-sulfotransferase activity [goid 0008467] [evidence IEA]; go_function: transferase activity [goid 0016740] [evidence IEA]
HLA-DMB	NM_002118.3	5664.58	944.12	6	1980390	GI_18641376	1288	CTCCTGGGGCTCTCAGTGTGCCATAGAGGACAGCAACTGGTGATTGTTTC	Homo sapiens major histocompatibility complex, class II, DM beta (HLA-DMB), mRNA.											go_component: integral to membrane [goid 0016021] [evidence IEA]; go_function: MHC-interacting protein [goid 0003822] [evidence TAS] [pmid 8139690]; go_function: chaperone activity [goid 0003754] [evidence NR]; go_function: MHC class II receptor activity [goid 0045012] [evidence IEA]; go_process: perception of pest/pathogen/parasite [goid 0009596] [evidence TAS] [pmid 8139690]; go_process: immune…
SERPINE1	NM_000602.1	1470.28	246.73	5.96	6840139	GI_10835158	2440	GGGCTGCATGACCTACCAGGACAGAACTTTCCCCAATTACAGGGTGACTC	Homo sapiens serine (or cysteine) proteinase inhibitor, clade E (nexin, plasminogen activator inhibitor type 1), member 1 (SERPINE1), mRNA.											go_function: endopeptidase inhibitor activity [goid 0004866] [evidence NR]; go_function: serpin [goid 0004868] [evidence IEA]; go_function: plasminogen activator activity [goid 0008243] [evidence IEA]; go_function: serine protease inhibitor activity [goid 0004867] [evidence IEA]; go_process: blood coagulation [goid 0007596] [evidence TAS] [pmid 9207454]
C2	NM_000063.3	1077.98	182.73	5.9	3840056	GI_20631970	2353	CCTCTGAATGGCCACCCTTAGACCCTGTGATCCATCCTCTCTCCTAGCTG	Homo sapiens complement component 2 (C2), mRNA.											go_component: complement component C2 complex [goid 0005603] [evidence TAS] [pmid 6199794]; go_component: extracellular space [goid 0005615] [evidence E] [pmid 8621452]; go_function: trypsin activity [goid 0004295] [evidence IEA]; go_function: classical-complement-pathway C3/C5 convertase activity [goid 0003813] [evidence IEA]; go_function: chymotrypsin activity [goid 0004263] [evidence IEA]; go_…
MMP19	NM_022792.1	1066.37	182.87	5.83	3780576	GI_13027793	1731	CTGGAGGTCAATGGTGGAGGGAGATGCCTGGGTCCTGTTCTTCCTACATA	Homo sapiens matrix metalloproteinase 19 (MMP19), transcript variant rasi-9, mRNA.
FPRL2	NM_002030.3	1174.76	201.79	5.82	870563	GI_38455412	2229	CATGTCTGGACCTCAGCCTATATCCTGAGACTAAGTGGAAGTGGGAAAAG	Homo sapiens formyl peptide receptor-like 2 (FPRL2), mRNA.											go_component: integral to membrane [goid 0016021] [evidence TAS] [pmid 8198572]; go_component: plasma membrane [goid 0005886] [evidence TAS] [pmid 8198572]; go_function: N-formyl peptide receptor activity [goid 0004982] [evidence TAS] [pmid 8198572]; go_function: rhodopsin-like receptor activity [goid 0001584] [evidence IEA]; go_process: cell motility [goid 0006928] [evidence TAS] [pmid 8198572];…
SLCO2B1	NM_007256.2	2657.16	458.63	5.79	1780068	GI_41152057	3776	CTTGCCTTCTGAGCAGCTCCCAGTGCCAGGGCTTTGAGACTTTCCCACAT	Homo sapiens solute carrier organic anion transporter family, member 2B1 (SLCO2B1), mRNA.											go_component: integral to membrane [goid 0016021] [evidence IEA]; go_function: transporter activity [goid 0005215] [evidence IEA]; go_process: ion transport [goid 0006811] [evidence IEA]
BZRP	NM_000714.3	737.4	128.8	5.73	3830609	GI_21536444	154	TCCCGCTTTGTCCACGGCGAGGGTCTCCGCTGGTACGCCGGCCTGCAGAA	Homo sapiens benzodiazapine receptor (peripheral) (BZRP), transcript variant PBR, mRNA.											go_component: mitochondrial outer membrane [goid 0005741] [evidence NR]; go_function: benzodiazepine receptor activity [goid 0008503] [evidence E] [pmid 1326278]; go_process: mitochondrial translocation [goid 0006628] [evidence E] [pmid 1326278]
HLA-DRA	NM_019111.2	7732.62	1363.18	5.67	60100	GI_18641378	672	GGGAGTTTGATGCTCCAAGCCCTCTCCCAGAGACTACAGAGAACGTGGTG	Homo sapiens major histocompatibility complex, class II, DR alpha (HLA-DRA), mRNA.											go_component: integral to plasma membrane [goid 0005887] [evidence NAS] [pmid 6812963]; go_function: MHC class II receptor activity [goid 0045012] [evidence NAS] [pmid 6812963]; go_process: immune response [goid 0006955] [evidence NAS] [pmid 6812963]; go_process: antigen presentation, exogenous antigen [goid 0019884] [evidence IEA]; go_process: antigen processing, exogenous antigen via MHC class …
HLA-DQA1	XM_371812.1	1991.08	353.4	5.63	6550605	GI_41197088	1124	TCATCCAGGGCTGACTGAAACCGTGGCTAAGAATTGGGAGACTCTCTTGT	Homo sapiens major histocompatibility complex, class II, DQ alpha 1 (HLA-DQA1), mRNA.											go_component: integral to membrane [goid 0016021] [evidence IEA]; go_function: class II major histocompatibility complex antigen [goid 0003821] [evidence TAS] [pmid 2300572]; go_function: MHC class II receptor activity [goid 0045012] [evidence TAS]; go_process: pathogenesis [goid 0009405] [evidence TAS] [pmid 2300572]; go_process: immune response [goid 0006955] [evidence IEA]; go_process: antigen…
RPL18A	NM_000980.2	12313.4	2252.03	5.47	1500364	GI_15431299	18	GAACGCGGAGAGCACGCCATGAAGGCCTCGGGCACGCTACGAGAGTACAA	Homo sapiens ribosomal protein L18a (RPL18A), mRNA.											go_component: cytosolic large ribosomal subunit (sensu Eukarya) [goid 0005842] [evidence TAS] [pmid 9582194]; go_component: ribosome [goid 0005840] [evidence IEA]; go_component: intracellular [goid 0005622] [evidence IEA]; go_function: structural protein of ribosome [goid 0003735] [evidence P] [pmid 9582194]; go_function: RNA binding [goid 0003723] [evidence TAS] [pmid 9582194]; go_function: stru…
CTSL	NM_145918.1	5779.61	1060.12	5.45	3170047	GI_22202618	1269	GTCTACCAGCCCCCGCTGTGTCGGATACACACTCGAATCATTGAAGATCC	Homo sapiens cathepsin L (CTSL), transcript variant 2, mRNA.											go_component: lysosome [goid 0005764] [evidence NR]; go_function: cathepsin L activity [goid 0004217] [evidence TAS] [pmid 8419312]; go_function: hydrolase activity [goid 0016787] [evidence IEA]; go_process: proteolysis and peptidolysis [goid 0006508] [evidence IEA]
CXCL16	NM_022059.1	3233.95	593.88	5.45	6040593	GI_11545764	2081	CCATACGGGTTGGTTTCACCTCCTCAGTCCCTTGCCTACCCCAGTGAGAG	Homo sapiens chemokine (C-X-C motif) ligand 16 (CXCL16), mRNA.											go_component: integral to membrane [goid 0016021] [evidence IEA]; go_component: extracellular [goid 0005576] [evidence IEA]; go_function: cytokine activity [goid 0005125] [evidence IEA]; go_function: chemokine activity [goid 0008009] [evidence IEA]; go_process: chemotaxis [goid 0006935] [evidence IEA]; go_process: immune response [goid 0006955] [evidence IEA]
PLD3	NM_012268.1	885.98	162.98	5.44	4850059	GI_7110640	1720	CCTGAGGGACTGGGACTCCCCTTACATTCATGACCTTGACACCTCAGCTG	Homo sapiens phospholipase D3 (PLD3), mRNA.											go_function: phospholipase D activity [goid 0004630] [evidence TAS] [pmid 9140189]; go_function: catalytic activity [goid 0003824] [evidence IEA]; go_process: virulence [goid 0009406] [evidence P]; go_process: metabolism [goid 0008152] [evidence IEA]
FBP1	NM_000507.2	1543.06	284.01	5.43	6590390	GI_16579887	1248	CCGGAGAATTGCCTCTACCTGGACCTTTTGTCTCACACAGCAGTACCCTG	Homo sapiens fructose-1,6-bisphosphatase 1 (FBP1), mRNA.											go_function: fructose-2,6-bisphosphate 2-phosphatase activity [goid 0004331] [evidence TAS] [pmid 8387495]; go_function: hydrolase activity [goid 0016787] [evidence IEA]; go_function: fructose-bisphosphatase activity [goid 0042132] [evidence IEA]; go_function: phosphoric ester hydrolase activity [goid 0042578] [evidence IEA]; go_process: fructose metabolism [goid 0006000] [evidence TAS] [pmid 755…
OTOA	NM_170664.1	714.81	132.15	5.41	5670471	GI_24638451	2558	CAACATGTGTAGAGACAGGATGCTCCAGATGGTGGGACACCCTTCCCTGG	Homo sapiens otoancorin (OTOA), mRNA.
MR-1	NM_022572.2	887.68	164.62	5.39	6620463	GI_39725643	2682	TCCCCTCCAGGCTACCTCTGCACTTTGTCAATGCTTCTCTTGTGGCACTT	Homo sapiens myofibrillogenesis regulator 1 (MR-1), mRNA.
ITGB2	NM_000211.1	1298.53	242.26	5.36	6980121	GI_4557885	2306	CCCAGTGGAACAATGATAATCCCCTTTTCAAGAGCGCCACCACGACGGTC	Homo sapiens integrin, beta 2 (antigen CD18 (p95), lymphocyte function-associated antigen 1; macrophage antigen 1 (mac-1) beta subunit) (ITGB2), mRNA.											go_component: integrin complex [goid 0008305] [evidence P] [pmid 1683838]; go_function: cell adhesion receptor activity [goid 0004895] [evidence E]; go_process: integrin-mediated signaling pathway [goid 0007229] [evidence E]; go_process: cell adhesion [goid 0007155] [evidence E]; go_process: antimicrobial humoral response (sensu Invertebrata) [goid 0006960] [evidence E]
ALDOA	NM_184041.1	601.17	112.69	5.33	3610112	GI_34577109	103	AAGGGGTCCTGGTGACGAGTCCCGCGTTCTCTCCTTGAATCCACTCGCCA	Homo sapiens aldolase A, fructose-bisphosphate (ALDOA), transcript variant 2, mRNA.											go_function: fructose-bisphosphate aldolase activity [goid 0004332] [evidence TAS] [pmid 2825199]; go_function: lyase activity [goid 0016829] [evidence IEA]; go_process: fructose metabolism [goid 0006000] [evidence TAS] [pmid 2825199]; go_process: striated muscle contraction [goid 0006941] [evidence TAS] [pmid 8598869]; go_process: glycolysis [goid 0006096] [evidence TAS] [pmid 2825199]
SEPP1	NM_005410.1	2003.19	377.67	5.3	1410563	GI_4885590	1105	CAGCTTATACCCACAGAAGCCAGTGCCAGTTGACGCTGAAAGAATCAGGC	Homo sapiens selenoprotein P, plasma, 1 (SEPP1), mRNA.											go_function: selenium binding [goid 0008430] [evidence TAS] [pmid 8421687]; go_process: response to oxidative stress [goid 0006979] [evidence TAS] [pmid 2037562]
SLC15A3	NM_016582.1	1641.15	313.25	5.24	3800632	GI_7706116	1884	CGTCACGGCTCTCCTATTTGTCTGGATCGCTGGACGCTATGAGAGGGCGT	Homo sapiens solute carrier family 15, member 3 (SLC15A3), mRNA.											go_component: membrane [goid 0016020] [evidence IEA]; go_function: transporter activity [goid 0005215] [evidence IEA]; go_process: oligopeptide transport [goid 0006857] [evidence IEA]
SGK	NM_005627.2	2151.41	413.09	5.21	450148	GI_25168262	1775	CCCTTGTGGATATGCTGTGTGAACCGTCGTGTGAGTGTGGTATGCCTGAT	Homo sapiens serum/glucocorticoid regulated kinase (SGK), mRNA.											go_component: nucleus [goid 0005634] [evidence IEA]; go_function: protein serine/threonine kinase activity [goid 0004674] [evidence TAS] [pmid 9114008]; go_function: cAMP-dependent protein kinase activity [goid 0004691] [evidence IEA]; go_function: protein kinase CK2 activity [goid 0004682] [evidence IEA]; go_function: ATP binding [goid 0005524] [evidence IEA]; go_function: transferase activity […
NMES1	NM_197955.1	529.53	103.11	5.14	6130368	GI_37694066	335	GAAGAGTTGCAAAATGTCCAAAGGGTGACCAAATGACGAGCCCTCGCCTC	Homo sapiens normal mucosa of esophagus specific 1 (NMES1), transcript variant 1, mRNA.
PSAP	NM_002778.1	10848.6	2125.95	5.1	510524	GI_11386146	2207	GTGGGGCCAAGGGTTCTCTGTCCCTGGTTCAACTGTGATTTGGCTTTCCC	Homo sapiens prosaposin (variant Gaucher disease and variant metachromatic leukodystrophy) (PSAP), mRNA.											go_component: lysosome [goid 0005764] [evidence IEA]; go_component: integral to membrane [goid 0016021] [evidence TAS] [pmid 1454804]; go_component: extracellular space [goid 0005615] [evidence TAS] [pmid 1454804]; go_function: lipid binding [goid 0008289] [evidence TAS] [pmid 1454804]; go_function: enzyme activator activity [goid 0008047] [evidence TAS] [pmid 2717620]; go_process: glycosphingoli…
LOC56901	NM_020142.3	918.86	180.36	5.09	4150079	GI_34147589	846	TACGTGTTGAGCGTGGCCTACGTGAGCCAACAAGAAGCAGGGGCCTCTGA	Homo sapiens NADH:ubiquinone oxidoreductase MLRQ subunit homolog (LOC56901), mRNA.
MYL9	NM_006097.3	975.2	192.71	5.06	3870520	GI_31563522	367	GGAGAAGCTGAACGGCACGGACCCCGAGGATGTGATTCGCAACGCCTTTG	Homo sapiens myosin, light polypeptide 9, regulatory (MYL9), transcript variant 1, mRNA.											go_component: muscle myosin [goid 0005859] [evidence P] [pmid 2526655]; go_function: structural constituent of muscle [goid 0008307] [evidence P] [pmid 2526655]; go_process: regulation of muscle contraction [goid 0006937] [evidence P] [pmid 2526655]
HLA-DQB1	NM_002123.2	2114.5	418.26	5.06	5550280	GI_24797068	962	TGTCACGCAGCCACCAGGTCATCTCCTTTCATCCCCACCTTGAGGCGGAT	Homo sapiens major histocompatibility complex, class II, DQ beta 1 (HLA-DQB1), mRNA.
LAPTM5	NM_006762.1	1142.71	226.65	5.04	4920025	GI_5803055	2096	AGGGTCTCTGGGGACTGTCGGGGGGTACAGAGGGAGAAGGCTCTGCAAGA	Homo sapiens Lysosomal-associated multispanning membrane protein-5 (LAPTM5), mRNA.											go_component: lysosome [goid 0005764] [evidence TAS] [pmid 8661146]; go_component: integral to plasma membrane [goid 0005887] [evidence TAS] [pmid 8661146]
RGS1	NM_002922.2	860.52	171.29	5.02	3170100	GI_21361446	873	GCTCTGTATTAGAAAGCCCCTCAGAACTGGGAAGGCCAGGTAACTCTAGT	Homo sapiens regulator of G-protein signalling 1 (RGS1), mRNA.											go_component: plasma membrane [goid 0005886] [evidence TAS] [pmid 10480894]; go_function: GTPase activator activity [goid 0005096] [evidence TAS] [pmid 10747990]; go_function: calmodulin binding [goid 0005516] [evidence TAS] [pmid 10747990]; go_function: signal transducer activity [goid 0004871] [evidence IEA]; go_process: G-protein signaling, adenylate cyclase inhibiting pathway [goid 0007193] […
MS4A7	NM_021201.3	1326.6	264.22	5.02	4060088	GI_23110999	773	GCTCTACTCCAACAACCCTGGGAGTTCATTTTCCTCGACCCAGTCACAAG	Homo sapiens membrane-spanning 4-domains, subfamily A, member 7 (MS4A7), mRNA.											go_component: integral to membrane [goid 0016021] [evidence IEA]; go_function: receptor activity [goid 0004872] [evidence IEA]
VAMP8	NM_003761.2	3707.27	738.77	5.02	5720022	GI_14043025	560	GTGGCTGCATTTCTTGGGTCCTTAGAGTGGGCTGGAGAGACCTAGAGGGC	Homo sapiens vesicle-associated membrane protein 8 (endobrevin) (VAMP8), mRNA.											go_component: synaptic vesicle [goid 0008021] [evidence NR]; go_component: early endosome [goid 0005769] [evidence TAS] [pmid 9614193]; go_component: membrane fraction [goid 0005624] [evidence TAS] [pmid 9614193]; go_process: nonselective vesicle docking [goid 0006904] [evidence NR]; go_process: nonselective vesicle transport [goid 0006899] [evidence TAS] [pmid 9614193]; go_process: protein compl…
SCD	NM_005063.3	2040.26	414.22	4.93	2640152	GI_31982900	4990	TAGGAATGTCCACCATGAACTTGATACGTCCGTGTGTCCCAGATGCTGTC	Homo sapiens stearoyl-CoA desaturase (delta-9-desaturase) (SCD), mRNA.											go_component: endoplasmic reticulum [goid 0005783] [evidence IEA]; go_component: integral to membrane [goid 0016021] [evidence IEA]; go_function: stearoyl-CoA 9-desaturase activity [goid 0004768] [evidence TAS] [pmid 10229681]; go_function: iron ion binding [goid 0005506] [evidence IEA]; go_function: oxidoreductase activity [goid 0016491] [evidence IEA]; go_process: fatty acid biosynthesis [goid …
FUCA1	NM_000147.2	3749.09	764.11	4.91	5860603	GI_24475878	1742	GTCACCCTGTTGCCTATGGGAGGAGGTGGAAGGATTTGGCAAGCTCAACC	Homo sapiens fucosidase, alpha-L- 1, tissue (FUCA1), mRNA.											go_component: lysosome [goid 0005764] [evidence NR]; go_component: cytoplasm [goid 0005737] [evidence TAS] [pmid 4074382]; go_function: alpha-L-fucosidase activity [goid 0004560] [evidence TAS] [pmid 4074382]; go_function: hydrolase activity, acting on glycosyl bonds [goid 0016798] [evidence IEA]; go_process: carbohydrate metabolism [goid 0005975] [evidence IEA]
UCP2	NM_003355.2	1426.82	291.11	4.9	4590270	GI_13259540	1479	ACTCATTGTCTCAGTGCTGGTGGAGTTGACATTTGACAGTGTGGGAGGCC	Homo sapiens uncoupling protein 2 (mitochondrial, proton carrier) (UCP2), nuclear gene encoding mitochondrial protein, mRNA.											go_component: mitochondrial inner membrane [goid 0005743] [evidence NR] [pmid 9196039]; go_component: mitochondrion [goid 0005739] [evidence IEA]; go_component: integral to membrane [goid 0016021] [evidence IEA]; go_component: membrane fraction [goid 0005624] [evidence NR]; go_function: uncoupling protein activity [goid 0015302] [evidence TAS] [pmid 9054939]; go_function: binding [goid 0005488] […
TNFRSF11B	NM_002546.2	2299.13	470.15	4.89	6510750	GI_22547122	1492	GGCGAGATCCCATGGATGAGTAAACTGTTTCTCAGGCACTTGAGGCTTTC	Homo sapiens tumor necrosis factor receptor superfamily, member 11b (osteoprotegerin) (TNFRSF11B), mRNA.											go_component: extracellular [goid 0005576] [evidence TAS] [pmid 9108485]; go_function: cytokine activity [goid 0005125] [evidence TAS] [pmid 9168977]; go_function: receptor activity [goid 0004872] [evidence TAS] [pmid 9108485]; go_process: skeletal development [goid 0001501] [evidence TAS] [pmid 9108485]; go_process: signal transduction [goid 0007165] [evidence TAS] [pmid 9168977]; go_process: ap…
IL1RN	NM_173842.1	728.11	149.29	4.88	3940070	GI_27894318	1626	GCACCTAGCCTCGCTCTTGGCAGGTACTCAGCGAATGAATGCTGTATATG	Homo sapiens interleukin 1 receptor antagonist (IL1RN), transcript variant 1, mRNA.											go_component: extracellular space [goid 0005615] [evidence P] [pmid 1385987]; go_component: intracellular [goid 0005622] [evidence NR]; go_function: interleukin-1 receptor antagonist activity [goid 0005152] [evidence E] [pmid 2139180]; go_process: inflammatory response [goid 0006954] [evidence NR]
CD36	NM_000072.1	962.27	197.63	4.87	3390292	GI_4557418	1011	CGTTCTTCCATCCAAGGCCTTTGCCTCTCCAGTTGAAAACCCAGACAACT	Homo sapiens CD36 antigen (collagen type I receptor, thrombospondin receptor) (CD36), mRNA.											go_component: membrane fraction [goid 0005624] [evidence TAS] [pmid 2468669]; go_component: integral to plasma membrane [goid 0005887] [evidence TAS] [pmid 2468669]; go_function: cell adhesion molecule activity [goid 0005194] [evidence IEA]; go_function: receptor activity [goid 0004872] [evidence IEA]; go_process: fatty acid metabolism [goid 0006631] [evidence NR]; go_process: blood coagulation […
CSTB	NM_000100.2	4484.6	923.09	4.86	6350605	GI_20357564	513	CCCCTTGGGGTGGAAGGGGCAGGATTCTGCAGCTGCTTTTGCATTTCTCT	Homo sapiens cystatin B (stefin B) (CSTB), mRNA.											go_component: nucleus [goid 0005634] [evidence IEA]; go_function: endopeptidase inhibitor activity [goid 0004866] [evidence E]; go_function: cysteine protease inhibitor activity [goid 0004869] [evidence IEA]
TNC	NM_002160.1	1177.27	243.77	4.83	3520390	GI_4504548	7056	CCCTGGGGCCAACGGCAACAGCATGGGCCTCACCTCCTCTGTGATTTCTT	Homo sapiens tenascin C (hexabrachion) (TNC), mRNA.											go_component: extracellular matrix [goid 0005578] [evidence NR]; go_component: kinesin complex [goid 0005871] [evidence IEA]; go_function: binding [goid 0005488] [evidence TAS] [pmid 1704365]; go_function: cell adhesion receptor activity [goid 0004895] [evidence TAS] [pmid 1704365]; go_function: structural molecule activity [goid 0005198] [evidence IEA]; go_process: cell adhesion [goid 0007155] […
HLA-DMA	NM_006120.2	5245.75	1086.66	4.83	4150739	GI_18765714	1015	CCAGAGTGGCCTGCCTATCACAACCACATCCCTTCCCCCCACAAGGCAAT	Homo sapiens major histocompatibility complex, class II, DM alpha (HLA-DMA), mRNA.											go_component: integral to membrane [goid 0016021] [evidence IEA]; go_function: MHC-interacting protein [goid 0003822] [evidence TAS]; go_function: protein binding [goid 0005515] [evidence TAS]; go_function: chaperone activity [goid 0003754] [evidence NR]; go_function: MHC class II receptor activity [goid 0045012] [evidence IEA]; go_process: perception of pest/pathogen/parasite [goid 0009596] [evi…
MS4A6A	NM_022349.2	2942.61	610.94	4.82	5360164	GI_23238233	796	CTCTCTGATGCTGATTTGCACTCTGCTGGAATTCTGCCTAGCTGTGCTCA	Homo sapiens membrane-spanning 4-domains, subfamily A, member 6A (MS4A6A), transcript variant 2, mRNA.											go_component: integral to membrane [goid 0016021] [evidence IEA]; go_function: receptor activity [goid 0004872] [evidence IEA]
CD14	NM_000591.1	3054.32	634.85	4.81	840750	GI_4557416	980	GCTGGAACAGGTGCCTAAAGGACTGCCAGCCAAGCTCAGAGTGCTCGATC	Homo sapiens CD14 antigen (CD14), mRNA.											go_component: plasma membrane [goid 0005886] [evidence TAS] [pmid 9548256]; go_component: extrinsic to membrane [goid 0019898] [evidence NR]; go_function: peptidoglycan recognition activity [goid 0016019] [evidence TAS] [pmid 8798531]; go_function: antibacterial peptide activity [goid 0003797] [evidence NR]; go_function: GPI-anchored membrane-bound receptor [goid 0015025] [evidence NR]; go_proces…
LOC388783	XM_371390.2	704.23	146.68	4.8	6590575	GI_42662266	61	AGAATAAGAGGTGATAGGCAGTTCGGCGGTCCAGTGGGTCTGTCTCTTGC	Homo sapiens similar to hypothetical protein (LOC388783), mRNA.
PLAU	NM_002658.1	2888.59	602.38	4.8	6130142	GI_4505862	2153	GGCCAGTTATCCCTTCCTTTTAGCCTAGTTCATCCAATCCTCACTGGGTG	Homo sapiens plasminogen activator, urokinase (PLAU), mRNA.											go_component: extracellular space [goid 0005615] [evidence NR]; go_function: u-plasminogen activator activity [goid 0004297] [evidence TAS] [pmid 10749881]; go_function: cell adhesion molecule activity [goid 0005194] [evidence NR]; go_function: trypsin activity [goid 0004295] [evidence IEA]; go_function: chymotrypsin activity [goid 0004263] [evidence IEA]; go_function: hydrolase activity [goid 00…
FCER1G	NM_004106.1	3670.86	774.86	4.74	4730184	GI_4758343	215	GTTTACACGGGCCTGAGCACCAGGAACCAGGAGACTTACGAGACTCTGAA	Homo sapiens Fc fragment of IgE, high affinity I, receptor for; gamma polypeptide (FCER1G), mRNA.											go_component: integral to plasma membrane [goid 0005887] [evidence TAS] [pmid 1535625]; go_component: plasma membrane [goid 0005886] [evidence E] [pmid 1535625]; go_function: receptor signaling protein activity [goid 0005057] [evidence NR]; go_function: transmembrane receptor activity [goid 0004888] [evidence IEA]; go_function: IgE binding [goid 0019863] [evidence IEA]; go_process: immune respons…
LOC375391	XM_353345.1	1428.64	301.88	4.73	6400408	GI_37540588	366	GCACTGAGGACCACGCTGCTCCGTGTGAATAAATGCCCAGTGGCACGCCT	Homo sapiens hypothetical gene supported by BC038466; BC047038 (LOC375391), mRNA.
CCRL2	NM_003965.3	854.73	182.99	4.67	2510427	GI_40805833	1623	GCCTACGCTTGGTCCAGAACATCAAACTCCAAACCCTGGGGACAAACGAC	Homo sapiens chemokine (C-C motif) receptor-like 2 (CCRL2), mRNA.											go_component: integral to plasma membrane [goid 0005887] [evidence P] [pmid 9473515]; go_function: chemokine receptor activity [goid 0004950] [evidence P] [pmid 9473515]; go_process: chemotaxis [goid 0006935] [evidence P] [pmid 9473515]; go_process: G-protein coupled receptor protein signaling pathway [goid 0007186] [evidence P] [pmid 9473515]; go_process: antimicrobial humoral response (sensu In…
CXCR4	NM_003467.1	1734.82	377.2	4.6	2340593	GI_4503174	1344	GGCAGGACCTGTGGCCAAGTTCTTAGTTGCTGTATGTCTCGTGGTAGGAC	Homo sapiens chemokine (C-X-C motif) receptor 4 (CXCR4), mRNA.											go_component: cytoplasm [goid 0005737] [evidence TAS] [pmid 10415069]; go_component: integral to plasma membrane [goid 0005887] [evidence TAS] [pmid 10644702]; go_component: plasma membrane [goid 0005886] [evidence E]; go_function: chemokine receptor activity [goid 0004950] [evidence E]; go_function: coreceptor activity [goid 0015026] [evidence TAS] [pmid 10754293]; go_function: G-protein coupled…
IL8	NM_000584.2	1133.03	248.37	4.56	5670500	GI_28610153	1345	CCCAGTCTTGTCATTGCCAGCTGTGTTGGTAGTGCTGTGTTGAATTACGG	Homo sapiens interleukin 8 (IL8), mRNA.											go_component: obsolete [goid 0008370] [evidence NR]; go_component: soluble fraction [goid 0005625] [evidence TAS] [pmid 11483765]; go_component: extracellular space [goid 0005615] [evidence TAS] [pmid 10823949]; go_function: interleukin-8 receptor binding [goid 0005153] [evidence IPI] [pmid 1840701]; go_function: chemokine activity [goid 0008009] [evidence TAS] [pmid 10881932]; go_process: negati…
C1QB	NM_000491.2	8724.7	1931.48	4.52	4570368	GI_11038661	895	CCTTGCCCAGCCAATGGACACAGTAGGGCTTGGTGAATGCTGCTGAGTGA	Homo sapiens complement component 1, q subcomponent, beta polypeptide (C1QB), mRNA.											go_component: complement component C1q complex [goid 0005602] [evidence TAS] [pmid 1706597]; go_component: microfibril [goid 0001527] [evidence IEA]; go_function: complement activity [goid 0003811] [evidence TAS] [pmid 1706597]; go_process: complement activation [goid 0006956] [evidence P] [pmid 1706597]; go_process: complement activation, classical pathway [goid 0006958] [evidence IEA]
DPP7	NM_013379.1	700.14	155.34	4.51	6350070	GI_7019510	1050	GGCCTGCACCGAGATCAACCTGACCTTCGCCAGCAACAATGTGACCGATA	Homo sapiens dipeptidylpeptidase 7 (DPP7), mRNA.											go_component: lysosome [goid 0005764] [evidence IEA]; go_function: serine-type peptidase activity [goid 0008236] [evidence E] [pmid 10567372]; go_function: aminopeptidase activity [goid 0004177] [evidence IEA]; go_function: serine-type endopeptidase activity [goid 0004252] [evidence IEA]; go_function: hydrolase activity [goid 0016787] [evidence IEA]; go_process: proteolysis and peptidolysis [goid…
C5R1	NM_001736.1	1372.87	306.39	4.48	1340025	GI_4502508	2144	ACCCCAGCCGTGTCCCTAACCCCTGGCAACCAGGAATCCACTCTCCATTT	Homo sapiens complement component 5 receptor 1 (C5a ligand) (C5R1), mRNA.											go_component: integral to plasma membrane [goid 0005887] [evidence TAS] [pmid 2007135]; go_component: plasma membrane [goid 0005886] [evidence E] [pmid 2007135]; go_function: C5a anaphylatoxin receptor activity [goid 0004944] [evidence TAS] [pmid 10352266]; go_function: rhodopsin-like receptor activity [goid 0001584] [evidence IEA]; go_process: activation of MAPK [goid 0000187] [evidence TAS] [pm…
LCP1	NM_002298.2	1928.79	432.41	4.46	1850736	GI_7382490	3592	CTTCAGATTGAACTTACTGTAGCCTCAGATGATTTCCCCCCTCCGCCTCC	Homo sapiens lymphocyte cytosolic protein 1 (L-plastin) (LCP1), mRNA.											go_component: cytosol [goid 0005829] [evidence IDA] [pmid 2111166]; go_function: actin binding [goid 0003779] [evidence NAS] [pmid 2252891]; go_function: calcium ion binding [goid 0005509] [evidence NAS] [pmid 2378651]; go_process: biological_process unknown [goid 0000004] [evidence ND]
FLJ14153	NM_022736.1	2090.7	468.88	4.46	3780408	GI_12232392	1937	TCACGAACAATAGCTTGCGCTCTACTCTGTAGTTATGTGGATTGCCGAGC	Homo sapiens hypothetical protein FLJ14153 (FLJ14153), mRNA.
C1QA	NM_015991.1	6775.25	1522.79	4.45	5550161	GI_7705752	781	TCTCTGGCTTCCATGCTCCGCCTGTAAAATGGGGGCGCTATTGCTTCAGC	Homo sapiens complement component 1, q subcomponent, alpha polypeptide (C1QA), mRNA.											go_component: complement component C1q complex [goid 0005602] [evidence TAS] [pmid 9461517]; go_component: microfibril [goid 0001527] [evidence IEA]; go_component: nucleus [goid 0005634] [evidence IEA]; go_function: complement activity [goid 0003811] [evidence TAS] [pmid 9461517]; go_function: DNA binding [goid 0003677] [evidence IEA]; go_process: complement activation [goid 0006956] [evidence E]…
RPLP0	NM_001002.2	3012.6	678.06	4.44	3710672	GI_16933547	378	ATGTTGCTGGCCAATAAGGTGCCAGCTGCTGCCCGTGCTGGTGCCATTGC	Homo sapiens ribosomal protein, large, P0 (RPLP0), transcript variant 1, mRNA.											go_component: cytosolic large ribosomal subunit (sensu Eukarya) [goid 0005842] [evidence TAS] [pmid 3323886]; go_component: ribosome [goid 0005840] [evidence IEA]; go_component: intracellular [goid 0005622] [evidence IEA]; go_function: structural protein of ribosome [goid 0003735] [evidence E] [pmid 3323886]; go_function: RNA binding [goid 0003723] [evidence TAS] [pmid 3323886]; go_function: stru…
MS4A6A	NM_022349.2	1766.71	398.89	4.43	450632	GI_23238233	1191	GCTATGAGTTTGTGCCTTTGCTGAGGACACTAGAACCTGGCTTGCCTCCC	Homo sapiens membrane-spanning 4-domains, subfamily A, member 6A (MS4A6A), transcript variant 2, mRNA.											go_component: integral to membrane [goid 0016021] [evidence IEA]; go_function: receptor activity [goid 0004872] [evidence IEA]
EMILIN2	NM_032048.1	1102.75	250.02	4.41	6020142	GI_14042987	3844	ACTTAACCTGCTCAGGCGGGCCTTCGCCCAGCTGCAAATAGGGATGCGTT	Homo sapiens elastin microfibril interfacer 2 (EMILIN2), mRNA.											go_component: extracellular [goid 0005576] [evidence IDA] [pmid 11278945]; go_component: extracellular matrix [goid 0005578] [evidence IEA]; go_function: protein binding [goid 0005515] [evidence IPI] [pmid 11278945]; go_function: extracellular matrix constituent conferring elasticity activity [goid 0030023] [evidence NAS] [pmid 11278945]; go_function: cell adhesion molecule activity [goid 0005194…
F2R	NM_001992.2	813.17	184.43	4.41	6660112	GI_6031164	2728	ACCCATTATGCGCTGTGGCCACTCCAATAGGTGCTGAGTGTACAGAGTGG	Homo sapiens coagulation factor II (thrombin) receptor (F2R), mRNA.											go_component: Golgi apparatus [goid 0005794] [evidence TAS] [pmid 7961693]; go_component: integral to plasma membrane [goid 0005887] [evidence TAS] [pmid 1672265]; go_component: plasma membrane [goid 0005886] [evidence E]; go_function: thrombin receptor activity [goid 0015057] [evidence TAS] [pmid 9038223]; go_function: receptor binding [goid 0005102] [evidence TAS] [pmid 1672265]; go_function: r…
LGMN	NM_005606.3	3054.81	693.72	4.4	70647	GI_21914880	1708	TTTGCCTGTTAGTTTTGAGGAGCAGGAAGCTCATGGGGGCTTCTGTAGCC	Homo sapiens legumain (LGMN), mRNA.											go_component: lysosome [goid 0005764] [evidence IEA]; go_function: legumain activity [goid 0001509] [evidence TAS] [pmid 9065484]; go_function: hydrolase activity [goid 0016787] [evidence IEA]; go_process: proteolysis and peptidolysis [goid 0006508] [evidence IEA]
COL6A2	NM_058174.1	482.95	109.85	4.4	4590372	GI_17402876	2402	TGCGACAAGCCACAGCAGGTGCGCAACATGACGCTGTTCTCCGACCTGGT	Homo sapiens collagen, type VI, alpha 2 (COL6A2), transcript variant 2C2a, mRNA.											go_component: collagen type VI [goid 0005589] [evidence E]; go_function: collagen [goid 0005202] [evidence E]; go_process: muscle development [goid 0007517] [evidence P]
GRN	NM_002087.1	3868.26	892.59	4.33	2510524	GI_4504150	1960	CCCATCACCATGGGAGGTGGGGCCTCAATCTAAGGCCTTCCCTGTCAGAA	Homo sapiens granulin (GRN), mRNA.											go_component: extracellular [goid 0005576] [evidence NR]; go_function: growth factor activity [goid 0008083] [evidence P] [pmid 1542665]; go_process: positive regulation of cell proliferation [goid 0008284] [evidence NR]; go_process: signal transduction [goid 0007165] [evidence NR]; go_process: cell proliferation [goid 0008283] [evidence NR]; go_process: cell-cell signaling [goid 0007267] [eviden…
FOLR2	NM_000803.2	3615.46	839.56	4.31	6180286	GI_9257218	1015	TAGTCACCTAACCCTCTGTCACCCAGTCTGTTGCTGCTCCATGGTGGGGC	Homo sapiens folate receptor 2 (fetal) (FOLR2), mRNA.											go_component: membrane fraction [goid 0005624] [evidence E] [pmid 2605182]; go_function: folic acid binding [goid 0005542] [evidence P] [pmid 2605182]; go_process: folate transport [goid 0015884] [evidence P] [pmid 2605182]
TM7SF1	NM_003272.1	1610.08	376.15	4.28	5420465	GI_4507544	1843	GGTTCAGGCCGTAGGTTCCTCAAGGAATCTCTTAAGTTTTGCCCAAAGAC	Homo sapiens transmembrane 7 superfamily member 1 (upregulated in kidney) (TM7SF1), mRNA.											go_component: membrane fraction [goid 0005624] [evidence TAS] [pmid 9521871]; go_component: integral to plasma membrane [goid 0005887] [evidence TAS] [pmid 9521871]
CENTA2	NM_018404.1	1304.77	305.11	4.28	1690112	GI_8923762	2490	GACCACCTGTGAACTCTGTTGGGTGTACTCTGCTAAGTTCTGGGGATGAG	Homo sapiens centaurin, alpha 2 (CENTA2), mRNA.											go_component: nucleus [goid 0005634] [evidence IEA]; go_component: cellular_component unknown [goid 0008372] [evidence ND]; go_function: GTPase activator activity [goid 0005096] [evidence IEA]; go_function: DNA binding [goid 0003677] [evidence IEA]; go_function: molecular_function unknown [goid 0005554] [evidence ND]; go_process: biological_process unknown [goid 0000004] [evidence ND]
LOC155340	XM_055725.3	1197.64	280.88	4.26	6660026	GI_37538348	1167	AGCGCCCTTTGCACCTCCTATCTCCAGGGTCCGCCGAGAGCCACGATTTT	Homo sapiens similar to unc-93 homolog B1; unc93 (C.elegans) homolog B; unc-93 related protein (LOC155340), mRNA.
CDW52	NM_001803.1	1483.58	348.67	4.25	5720687	GI_4502760	80	TACAAACTGGACTCTCAGGACAAAACGACACCAGCCAAACCAGCAGCCCC	Homo sapiens CDW52 antigen (CAMPATH-1 antigen) (CDW52), mRNA.											go_component: membrane [goid 0016020] [evidence IEA]; go_component: membrane fraction [goid 0005624] [evidence TAS] [pmid 1711975]; go_component: integral to plasma membrane [goid 0005887] [evidence TAS] [pmid 1711975]; go_function: lymphocyte antigen [goid 0005557] [evidence NR]
PLEK	NM_002664.1	1295.66	305.81	4.24	940731	GI_4505878	2532	GCCCTCCCTCAATTCCCCTGTAACATTCCTGAAGCTGTTCCCACTCCCAG	Homo sapiens pleckstrin (PLEK), mRNA.											go_function: calcium ion binding [goid 0005509] [evidence TAS] [pmid 2897630]; go_process: intracellular signaling cascade [goid 0007242] [evidence IEA]
SNX10	NM_013322.2	912.03	217.35	4.2	6400025	GI_23111022	2342	GTAAAGTTCATGCCATCCAGGCATTTAAGAGCGATCCTCATCCCTTCAGC	Homo sapiens sorting nexin 10 (SNX10), mRNA.
OLR1	NM_002543.2	710.29	169.49	4.19	4540142	GI_37595562	2148	GTGTCACAATGCTCCTCCTGATGACTCCTCCCCAGAAAACCACCAATCGG	Homo sapiens oxidised low density lipoprotein (lectin-like) receptor 1 (OLR1), mRNA.											go_component: membrane fraction [goid 0005624] [evidence TAS] [pmid 9052782]; go_component: integral to plasma membrane [goid 0005887] [evidence TAS] [pmid 9052782]; go_function: LDL receptor [goid 0008032] [evidence E] [pmid 9828121]; go_function: lectin [goid 0005530] [evidence IEA]; go_function: sugar binding [goid 0005529] [evidence IEA]; go_function: receptor activity [goid 0004872] [evidenc…
CPVL	NM_031311.2	1333.05	320.15	4.16	4850497	GI_22027517	1261	CGCTCCTTGATGGGCATGGACTGGAAAGGATCCCAGGAATACAAGAAGGC	Homo sapiens carboxypeptidase, vitellogenic-like (CPVL), transcript variant 1, mRNA.											go_function: serine carboxypeptidase activity [goid 0004185] [evidence IEA]; go_function: carboxypeptidase activity [goid 0004180] [evidence IEA]; go_function: hydrolase activity [goid 0016787] [evidence IEA]; go_process: proteolysis and peptidolysis [goid 0006508] [evidence IEA]
MARCO	NM_006770.2	848.5	204.01	4.16	3450347	GI_20149581	1498	TGATGCCATTGTCTTCTGCCGCATGCTGGGTTACTCCAAAGGAAGGGCCC	Homo sapiens macrophage receptor with collagenous structure (MARCO), mRNA.											go_component: integral to membrane [goid 0016021] [evidence IEA]; go_component: microfibril [goid 0001527] [evidence IEA]; go_component: integral to plasma membrane [goid 0005887] [evidence P] [pmid 9468508]; go_function: macrophage receptor activity [goid 0008019] [evidence P] [pmid 10331948]; go_function: transmembrane receptor activity [goid 0004888] [evidence P] [pmid 10331948]; go_function: …
LY96	NM_015364.2	1752.96	421.94	4.15	2650725	GI_34098964	505	TGGGAGCCCAGAAGAAATGCTCTTTTGCTTGGAGTTTGTCATCCTACACC	Homo sapiens lymphocyte antigen 96 (LY96), mRNA.											go_component: plasma membrane [goid 0005886] [evidence TAS] [pmid 10359581]; go_function: coreceptor activity [goid 0015026] [evidence TAS] [pmid 10359581]; go_process: antibacterial humoral response (sensu Invertebrata) [goid 0006961] [evidence TAS] [pmid 10359581]; go_process: cell surface receptor linked signal transduction [goid 0007166] [evidence TAS] [pmid 10359581]; go_process: cellular de…
NPL	NM_030769.1	633.69	153.19	4.14	2100685	GI_13540532	1295	TCCATCTGTCTTTAGGAGCTCTCATTATCTCGGTCTCTGGTTCCTAATCC	Homo sapiens N-acetylneuraminate pyruvate lyase (dihydrodipicolinate synthase) (NPL), mRNA.
CP	NM_000096.1	728.25	176.64	4.12	1980458	GI_4557484	2907	ACAAGGCCTCACAATGCACGTGGGAGATGAAGTCAACTGGTATCTGATGG	Homo sapiens ceruloplasmin (ferroxidase) (CP), mRNA.											go_component: extracellular space [goid 0005615] [evidence TAS] [pmid 7708681]; go_function: ferroxidase activity [goid 0004322] [evidence TAS]; go_function: copper ion binding [goid 0005507] [evidence IEA]; go_function: multicopper ferroxidase iron transport mediator activity [goid 0004323] [evidence IEA]; go_function: oxidoreductase activity [goid 0016491] [evidence IEA]; go_function: copper io…
TGFBI	NM_000358.1	5280.33	1287.86	4.1	1850301	GI_4507466	2555	GTGTCTCACATCTACACGTGGCTTGGAGGCTTTTATGGGGCCCTGTCCAG	Homo sapiens transforming growth factor, beta-induced, 68kDa (TGFBI), mRNA.											go_component: extracellular matrix [goid 0005578] [evidence IEA]; go_component: extracellular space [goid 0005615] [evidence TAS] [pmid 1388724]; go_function: integrin binding [goid 0005178] [evidence TAS] [pmid 1388724]; go_function: tumor suppressor [goid 0008181] [evidence TAS] [pmid 8024701]; go_function: structural molecule activity [goid 0005198] [evidence IEA]; go_function: cell adhesion m…
CHI3L1	NM_001276.1	429.1	105.96	4.05	2190497	GI_4557017	1582	TCCCTGCCCCCTAGCCCTCCTTATCAAAGGACACCATTTTGGCAAGCTCT	Homo sapiens chitinase 3-like 1 (cartilage glycoprotein-39) (CHI3L1), mRNA.											go_component: extracellular matrix [goid 0005578] [evidence TAS] [pmid 8245017]; go_component: extracellular space [goid 0005615] [evidence TAS] [pmid 8245017]; go_function: extracellular matrix glycoprotein [goid 0005207] [evidence TAS] [pmid 8245017]; go_function: hydrolase activity [goid 0016787] [evidence IEA]; go_function: extracellular matrix structural constituent [goid 0005201] [evidence …
ASAH1	NM_177924.1	1233.5	306.9	4.02	5570021	GI_30089927	1541	CTCCACCTCCGTGGAATAAATGGAGATTCAGCGTGGGTGTTGAATCCAGC	Homo sapiens N-acylsphingosine amidohydrolase (acid ceramidase) 1 (ASAH1), transcript variant 1, mRNA.											go_function: catalytic activity [goid 0003824] [evidence E] [pmid 8955159]; go_process: ceramide metabolism [goid 0006672] [evidence E] [pmid 8955159]; go_process: fatty acid metabolism [goid 0006631] [evidence NR]
HLA-DRB1	NM_002124.1	2879.66	716.99	4.02	670082	GI_4504410	888	AGAACCTTCTGTCCCAGCTTTGCAGAATGAAAAGCTTTCCTGCTTGGCAG	Homo sapiens major histocompatibility complex, class II, DR beta 1 (HLA-DRB1), mRNA.											go_component: integral to membrane [goid 0016021] [evidence IEA]; go_function: class II major histocompatibility complex antigen [goid 0003821] [evidence E]; go_function: MHC class II receptor activity [goid 0045012] [evidence IEA]; go_process: pathogenesis [goid 0009405] [evidence E]; go_process: immune response [goid 0006955] [evidence IEA]; go_process: antigen presentation, exogenous antigen […
LOC129439	XM_065237.5	483.72	120.69	4.01	1230373	GI_37547347	1508	TCACCGAGCGTGGCTATAGGTTCACCACCACGGCCGAGCAGGAAATTGTG	Homo sapiens similar to FKSG30 (LOC129439), mRNA.
GPNMB	NM_002510.1	6601.89	1647.38	4.01	5690180	GI_4505404	2252	CAATAACAGGCCCAAGCCTGTGGTATGATGTGCACACTTGCTAGACTCAG	Homo sapiens glycoprotein (transmembrane) nmb (GPNMB), mRNA.											go_component: integral to membrane [goid 0016021] [evidence TAS] [pmid 7814155]; go_process: negative regulation of cell proliferation [goid 0008285] [evidence TAS] [pmid 7814155]
AD026	NM_020683.3	579.71	147.12	3.94	630603	GI_40254935	1315	TGCAGCCAGGTAGCAACGGCGGTAGTCAGAGGAGCTATGATAGACCACAC	Homo sapiens AD026 protein (AD026), mRNA.
CTSS	NM_004079.3	1467.8	374.14	3.92	2230601	GI_23110961	3714	CCTGGCACCCAGAGAAAAGGAGCATCCTTACCTCCAAAAGCACAGGGACA	Homo sapiens cathepsin S (CTSS), mRNA.											go_component: lysosome [goid 0005764] [evidence NR]; go_function: cathepsin S activity [goid 0004218] [evidence TAS] [pmid 1373132]; go_function: hydrolase activity [goid 0016787] [evidence IEA]; go_process: proteolysis and peptidolysis [goid 0006508] [evidence TAS] [pmid 1373132]; go_process: immune response [goid 0006955] [evidence TAS] [pmid 8157683]
TPI1	NM_000365.3	1384.61	353.74	3.91	3170193	GI_26024330	518	GTCCTGGCCTATGAGCCTGTGTGGGCCATTGGTACTGGCAAGACTGCAAC	Homo sapiens triosephosphate isomerase 1 (TPI1), mRNA.											go_function: triose-phosphate isomerase activity [goid 0004807] [evidence TAS] [pmid 2579079]; go_function: isomerase activity [goid 0016853] [evidence IEA]; go_process: pentose-phosphate shunt [goid 0006098] [evidence IEA]; go_process: glycolysis [goid 0006096] [evidence IEA]; go_process: gluconeogenesis [goid 0006094] [evidence IEA]; go_process: metabolism [goid 0008152] [evidence IEA]; go_proc…
LOC391392	XM_372933.1	443.91	115.32	3.85	6040056	GI_41190543	156	AGGGCAGTCTCCACAGCTCCTGATCTATACGCTTTCCTATCGGGCCTCTG	Homo sapiens similar to immunoglobulin kappa light chain variable region O11 (LOC391392), mRNA.
TREM1	NM_018643.2	595.63	154.86	3.85	4920300	GI_31543823	717	GCCTGGTCTTCTCTGTCCTGTTTGCTGTCACGCTGAGGTCATTTGTACCC	Homo sapiens triggering receptor expressed on myeloid cells 1 (TREM1), mRNA.											go_component: plasma membrane [goid 0005886] [evidence NR]; go_function: receptor activity [goid 0004872] [evidence TAS] [pmid 10799849]; go_process: humoral immune response [goid 0006959] [evidence TAS] [pmid 10799849]; go_process: intracellular signaling cascade [goid 0007242] [evidence TAS] [pmid 10799849]
ABCG1	NM_016818.1	604.39	157.19	3.84	3940204	GI_8051576	2705	ATGCAGGTTCCAGGTGGAGGGAAGACGTGGACACCATCTCCACTGAGCCA	Homo sapiens ATP-binding cassette, sub-family G (WHITE), member 1 (ABCG1), transcript variant 2, mRNA.											go_component: membrane fraction [goid 0005624] [evidence P] [pmid 9034316]; go_component: integral to plasma membrane [goid 0005887] [evidence P] [pmid 9034316]; go_function: L-tryptophan transporter activity [goid 0015196] [evidence P] [pmid 9034316]; go_function: purine nucleotide transporter activity [goid 0015216] [evidence P] [pmid 9034316]; go_function: ATP binding [goid 0005524] [evidence …
TBXAS1	NM_030984.1	464.34	120.84	3.84	4850632	GI_13699839	1308	TGGCCACCAACCCTGACTGCCAAGAGAAGCTTCTGAGAGAGGTAGACGTT	Homo sapiens thromboxane A synthase 1 (platelet, cytochrome P450, family 5, subfamily A) (TBXAS1), transcript variant TXS-II, mRNA.											go_process: blood coagulation [goid 0007596] [evidence NR]
SLC25A3	NM_002635.1	760.55	199.06	3.82	580364	GI_4505774	223	GGCTCCGCGAAGTATTATGCACTGTGTGGCTTTGGTGGGGTCTTAAGTTG	Homo sapiens solute carrier family 25 (mitochondrial carrier; phosphate carrier), member 3 (SLC25A3), nuclear gene encoding mitochondrial protein, transcript variant 1b, mRNA.											go_component: mitochondrial inner membrane [goid 0005743] [evidence TAS] [pmid 8144629]; go_component: mitochondrion [goid 0005739] [evidence TAS] [pmid 8168843]; go_component: integral to plasma membrane [goid 0005887] [evidence TAS] [pmid 8144629]; go_function: phosphate carrier activity [goid 0015320] [evidence TAS] [pmid 8144629]; go_function: binding [goid 0005488] [evidence IEA]; go_functio…
MAFB	NM_005461.3	1652.3	433.29	3.81	1090427	GI_31652256	3018	TCCCATTTGAAATTGCTGGCGCTGCTGGCCGGATGCATTTTTGAGTTTGT	Homo sapiens v-maf musculoaponeurotic fibrosarcoma oncogene homolog B (avian) (MAFB), mRNA.											go_component: nucleus [goid 0005634] [evidence TAS] [pmid 8001130]; go_function: DNA binding [goid 0003677] [evidence IEA]; go_process: sensory organ development [goid 0007423] [evidence TAS] [pmid 8001130]; go_process: regulation of transcription, DNA-dependent [goid 0006355] [evidence IEA]
LHFPL2	NM_005779.1	1849.5	485.68	3.81	6290632	GI_32698675	4165	GACTGTGGTGAAACTCCTTCCAAGGCTGAGGGGGTCAGTAGGTGCTCTGG	Homo sapiens lipoma HMGIC fusion partner-like 2 (LHFPL2), mRNA.
SLC37A2	NM_198277.1	522.81	138.07	3.79	1580113	GI_38093648	2611	CCCGGATCACTCGCTGTTTTCTGGCTAGCTCTTGGCATCTCCATCTGAGC	Homo sapiens solute carrier family 37 (glycerol-3-phosphate transporter), member 2 (SLC37A2), mRNA.
KYNU	NM_003937.1	563.49	148.85	3.79	6450707	GI_4504936	1367	AGAGGAGTGGTTTGTGACAAGCGGAATCCAAATGGCATTCGAGTGGCTCC	Homo sapiens kynureninase (L-kynurenine hydrolase) (KYNU), mRNA.											go_function: peptidase activity [goid 0008233] [evidence TAS] [pmid 9180257]; go_function: kynureninase activity [goid 0030429] [evidence IEA]; go_process: tryptophan catabolism [goid 0006569] [evidence NR]; go_process: amino acid metabolism [goid 0006520] [evidence IEA]
CKLFSF7	NM_181472.1	1161.58	308.13	3.77	520541	GI_31657098	1079	GCTTGTCAGTCCGGTCTTAGAGATACCCTCTTTCCTGAAGTGAGGCGTGC	Homo sapiens chemokine-like factor super family 7 (CKLFSF7), transcript variant 2, mRNA.											go_component: membrane [goid 0016020] [evidence IEA]; go_component: synaptic vesicle [goid 0008021] [evidence IEA]; go_component: integral to membrane [goid 0016021] [evidence IEA]; go_function: transporter activity [goid 0005215] [evidence IEA]; go_function: cytokine activity [goid 0005125] [evidence IEA]; go_process: transport [goid 0006810] [evidence IEA]; go_process: chemotaxis [goid 0006935]…
FCGR2A	NM_021642.1	1530.68	410.6	3.73	2350082	GI_11056051	1756	GCCCTCTCTGTGGATCCCTACTGCTGGTTTCTGCCTTCTCCATGCTGAGA	Homo sapiens Fc fragment of IgG, low affinity IIa, receptor for (CD32) (FCGR2A), mRNA.											go_component: integral to membrane [goid 0016021] [evidence IEA]; go_component: plasma membrane [goid 0005886] [evidence NR] [pmid 2139735]; go_function: receptor signaling protein activity [goid 0005057] [evidence NR]; go_function: receptor activity [goid 0004872] [evidence IEA]; go_function: IgG binding [goid 0019864] [evidence IEA]; go_process: immune response [goid 0006955] [evidence NR]
CHIT1	NM_003465.1	378.54	101.63	3.72	3780075	GI_4502808	1453	AGGATCACTCTACAGCCTGCCTCCTGGGTTTTCCTGGGGGCCGCAATCTG	Homo sapiens chitinase 1 (chitotriosidase) (CHIT1), mRNA.											go_component: extracellular space [goid 0005615] [evidence TAS] [pmid 7592832]; go_function: chitinase activity [goid 0004568] [evidence TAS] [pmid 7836450]; go_function: chitin binding [goid 0008061] [evidence IEA]; go_function: hydrolase activity [goid 0016787] [evidence IEA]; go_function: hydrolase activity, acting on glycosyl bonds [goid 0016798] [evidence IEA]; go_process: response to bacter…
HF1	NM_000186.1	896.84	241.21	3.72	2970373	GI_4504374	3177	GCAGATGGACAGGAAGGCCAACATGCAGAGACACCTCCTGTGTGAATCCG	Homo sapiens H factor 1 (complement) (HF1), mRNA.											go_component: extracellular space [goid 0005615] [evidence TAS] [pmid 9312129]; go_function: complement activity [goid 0003811] [evidence TAS] [pmid 9312129]; go_process: complement activation [goid 0006956] [evidence E]; go_process: complement activation, alternative pathway [goid 0006957] [evidence IEA]
AIF1	NM_032955.1	2393.52	645.54	3.71	2450064	GI_14574565	204	TAATTGGAGAGGTGTCCAGTGGCTCCGGGGAGACGTTCAGCTACCCTGAC	Homo sapiens allograft inflammatory factor 1 (AIF1), transcript variant 1, mRNA.											go_component: nucleus [goid 0005634] [evidence P] [pmid 9614071]; go_process: cell cycle arrest [goid 0007050] [evidence E] [pmid 9614071]; go_process: negative regulation of cell proliferation [goid 0008285] [evidence E] [pmid 9614071]; go_process: response to stress [goid 0006950] [evidence E] [pmid 9614071]; go_process: inflammatory response [goid 0006954] [evidence E] [pmid 8912632]
IGSF6	NM_005849.1	636.39	172.17	3.7	5340717	GI_5031672	416	TGTGCCGGAAGCGAGAGCTAAACAGACAGGAGGAGGGACCACACTGGTGG	Homo sapiens immunoglobulin superfamily, member 6 (IGSF6), mRNA.											go_component: integral to plasma membrane [goid 0005887] [evidence TAS] [pmid 9809579]; go_function: transmembrane receptor activity [goid 0004888] [evidence TAS] [pmid 9809579]; go_process: cell surface receptor linked signal transduction [goid 0007166] [evidence TAS] [pmid 9809579]; go_process: immune response [goid 0006955] [evidence TAS] [pmid 9809579]
HCLS1	NM_005335.3	2086.93	567.02	3.68	2760647	GI_37059786	1731	GTGTTCCTGACTCCTTCCCAATGAACACCTCTCTGCCACCCCAAGCTCTG	Homo sapiens hematopoietic cell-specific Lyn substrate 1 (HCLS1), mRNA.											go_component: DNA-directed RNA polymerase II, core complex [goid 0005665] [evidence TAS] [pmid 2587259]; go_function: DNA binding [goid 0003677] [evidence P] [pmid 2587259]; go_function: transcription factor activity [goid 0003700] [evidence TAS] [pmid 2587259]; go_process: regulation of transcription, DNA-dependent [goid 0006355] [evidence TAS] [pmid 2587259]; go_process: intracellular signaling…
ALOX5	NM_000698.1	2320.66	630.58	3.68	2690180	GI_4502056	2284	AGGCGTCCTGTCCACACCCAGCTCAGCATTTCCACACCAAGCAGCAACAG	Homo sapiens arachidonate 5-lipoxygenase (ALOX5), mRNA.											go_function: arachidonate 5-lipoxygenase activity [goid 0004051] [evidence TAS] [pmid 2829172]; go_function: lipoxygenase activity [goid 0016165] [evidence IEA]; go_function: iron ion binding [goid 0005506] [evidence IEA]; go_function: oxidoreductase activity [goid 0016491] [evidence IEA]; go_process: leukotriene metabolism [goid 0006691] [evidence P] [pmid 3422434]; go_process: electron transpor…
LY86	NM_004271.1	980.94	266.83	3.68	50440	GI_4758707	660	AGTCCCAGGACCAGACATCCCCAGACTCCACAGATGTAATGAAGTCCCCG	Homo sapiens lymphocyte antigen 86 (LY86), mRNA.											go_component: plasma membrane [goid 0005886] [evidence TAS] [pmid 9763566]; go_function: signal transducer activity [goid 0004871] [evidence NR]; go_process: humoral immune response [goid 0006959] [evidence TAS] [pmid 9763566]; go_process: signal transduction [goid 0007165] [evidence NR]; go_process: apoptosis [goid 0006915] [evidence TAS] [pmid 9763566]; go_process: cell proliferation [goid 0008…
HLA-DPB1	NM_002121.4	19751	5403.32	3.66	1940072	GI_24797075	1013	CTCACTGGGCCTCCAACCATGTTCCCTTCTTCTTAGCACCACAAATAATC	Homo sapiens major histocompatibility complex, class II, DP beta 1 (HLA-DPB1), mRNA.											go_function: class II major histocompatibility complex antigen [goid 0003821] [evidence E] [pmid 8105536]; go_process: perception of pest/pathogen/parasite [goid 0009596] [evidence E] [pmid 8105536]; go_process: pathogenesis [goid 0009405] [evidence E] [pmid 8105536]
ABCA1	NM_005502.2	1460.61	399.87	3.65	6100070	GI_21536375	10145	GTGCTCTTTGTTCATCATTGGCCCTCATTCCAAGCACTTTACGCTGTCTG	Homo sapiens ATP-binding cassette, sub-family A (ABC1), member 1 (ABCA1), mRNA.											go_component: membrane fraction [goid 0005624] [evidence P] [pmid 10431236]; go_component: integral to plasma membrane [goid 0005887] [evidence P] [pmid 10431236]; go_function: anion transporter activity [goid 0008509] [evidence E]; go_function: sterol transporter activity [goid 0015248] [evidence P] [pmid 10431236]; go_function: ATP-binding cassette (ABC) transporter activity [goid 0004009] [evi…
CD53	NM_000560.2	1762.64	482.63	3.65	6400112	GI_21237756	1186	GGGAGTTCTGGGGCCAGGCTCACTGGACCATTGTCACAACCCTCTGTTTC	Homo sapiens CD53 antigen (CD53), mRNA.											go_component: integral to plasma membrane [goid 0005887] [evidence NR]; go_component: plasma membrane [goid 0005886] [evidence P]; go_process: signal transduction [goid 0007165] [evidence NR] [pmid 8404042]; go_process: antimicrobial humoral response (sensu Invertebrata) [goid 0006960] [evidence NR]; go_process: antimicrobial humoral response (sensu Vertebrata) [goid 0019735] [evidence NR]
CTSC	NM_001814.2	1092.09	300.43	3.64	3450095	GI_22538438	1345	CAGCCTCTGGGATGGATTACTGGATTGTTAAAAACAGCTGGGGCACCGGC	Homo sapiens cathepsin C (CTSC), transcript variant 1, mRNA.											go_component: lysosome [goid 0005764] [evidence NR]; go_function: cysteine-type endopeptidase activity [goid 0004197] [evidence IEA]; go_function: dipeptidyl-peptidase I activity [goid 0004214] [evidence IEA]; go_function: hydrolase activity [goid 0016787] [evidence IEA]; go_process: proteolysis and peptidolysis [goid 0006508] [evidence NR]; go_process: immune response [goid 0006955] [evidence TA…
LILRB2	NM_005874.1	1094.2	302.24	3.62	2320040	GI_5031910	2096	GACCATGAGGAGATGCTGGGAACTTTGGGACTCACTTGATTCTGCAGTCG	Homo sapiens leukocyte immunoglobulin-like receptor, subfamily B (with TM and ITIM domains), member 2 (LILRB2), mRNA.											go_component: membrane fraction [goid 0005624] [evidence TAS] [pmid 9079806]; go_component: integral to plasma membrane [goid 0005887] [evidence TAS] [pmid 9079806]; go_component: integral to membrane [goid 0016021] [evidence IEA]; go_function: defense/immunity protein activity [goid 0003793] [evidence TAS] [pmid 9382880]; go_function: receptor activity [goid 0004872] [evidence IEA] [pmid 9382880…
SH3BGRL3	NM_031286.2	8459.02	2338.77	3.62	5720152	GI_42476331	816	CCAAAGGCCCCGCAGTCCCTCTCCCAGGAGGACCCTAGAGGCAATTAAAT	Homo sapiens SH3 domain binding glutamic acid-rich protein like 3 (SH3BGRL3), mRNA.											go_component: nucleus [goid 0005634] [evidence IEA]
URP2	NM_031471.4	841.72	233.81	3.6	6510047	GI_34222247	2289	AGCTCATGTGGTGCCCCCTTTCCTTGTCTGAGTGGCTGAGGCTGATACCC	Homo sapiens UNC-112 related protein 2 (URP2), transcript variant URP2SF, mRNA.											go_component: cytoskeleton [goid 0005856] [evidence IEA]
TNFRSF21	NM_014452.3	572.22	158.96	3.6	4610053	GI_23238206	3519	AAAGGTGGCGTGGACTCCCTTTGTGTGGGTGGGGTTTGTGGGTAGTGGTG	Homo sapiens tumor necrosis factor receptor superfamily, member 21 (TNFRSF21), mRNA.
FCGR2B	NM_004001.2	716.21	199.32	3.59	3830170	GI_21361190	1181	ACCGACTGCACCTGCTGTCTTCAGCTCTTCTTGACATCAAGGCTCTTCCG	Homo sapiens Fc fragment of IgG, low affinity IIb, receptor for (CD32) (FCGR2B), mRNA.											go_component: integral to membrane [goid 0016021] [evidence IEA]; go_component: plasma membrane [goid 0005886] [evidence NR] [pmid 2139735]; go_function: internalization receptor activity [goid 0015029] [evidence TAS] [pmid 2142460]; go_function: IgG binding [goid 0019864] [evidence IEA]; go_process: signal transduction [goid 0007165] [evidence TAS] [pmid 2142460]; go_process: immune response [go…
PLTP	NM_182676.1	2042.44	568.47	3.59	430100	GI_33356540	1468	TCCCACATTCATAGCCTGTAGTGCCCCCTCTAACCCCCAGTGCCACAGAG	Homo sapiens phospholipid transfer protein (PLTP), transcript variant 2, mRNA.											go_component: extracellular [goid 0005576] [evidence TAS] [pmid 7654777]; go_function: lipid binding [goid 0008289] [evidence IEA]; go_process: lipid metabolism [goid 0006629] [evidence TAS] [pmid 7654777]; go_process: lipid transport [goid 0006869] [evidence IEA]
ARHGDIB	NM_001175.1	8363.47	2329.35	3.59	4150156	GI_10835001	1134	TTGTGGTTGTTGCTGGCCCAATGAGTCCCTAGTCACATCCCCTGCCAGAG	Homo sapiens Rho GDP dissociation inhibitor (GDI) beta (ARHGDIB), mRNA.											go_component: cytoplasmic vesicle [goid 0016023] [evidence TAS] [pmid 9113980]; go_function: Rho GDP-dissociation inhibitor activity [goid 0005094] [evidence TAS] [pmid 8262133]; go_function: GTPase activator activity [goid 0005096] [evidence IEA]; go_process: negative regulation of cell adhesion [goid 0007162] [evidence TAS] [pmid 9113980]; go_process: Rho protein signal transduction [goid 00072…
HLA-E	NM_005516.3	2349.14	655.45	3.58	5720593	GI_24797070	1045	AAGGCTGAGTGGAGCGACAGTGCCCAGGGGTCTGAGTCTCACAGCTTGTA	Homo sapiens major histocompatibility complex, class I, E (HLA-E), mRNA.											go_component: integral to membrane [goid 0016021] [evidence IEA]; go_function: class I major histocompatibility complex antigen [goid 0003820] [evidence E] [pmid 3260916]; go_function: MHC class I receptor activity [goid 0030106] [evidence TAS]; go_process: immune response [goid 0006955] [evidence IEA]; go_process: antigen presentation, endogenous antigen [goid 0019883] [evidence IEA]; go_process…
CCL5	NM_002985.2	1683.82	470.49	3.58	1570022	GI_22538813	1123	GGGAGGAACACTGCACTCTTAAGCTTCCGCCGTCTCAACCCCTCACAGGA	Homo sapiens chemokine (C-C motif) ligand 5 (CCL5), mRNA.											go_component: extracellular [goid 0005576] [evidence IEA]; go_function: chemokine activity [goid 0008009] [evidence TAS] [pmid 10770925]; go_function: antiviral response protein activity [goid 0003800] [evidence TAS] [pmid 10583963]; go_function: receptor binding [goid 0005102] [evidence E]; go_function: signal transducer activity [goid 0004871] [evidence E]; go_process: response to virus [goid 0…
DKFZp564I1922	NM_015419.1	1376	384.76	3.58	6040411	GI_18390318	9474	GCAGTATCTGGCTTGTCCATCTGGTCTAAGGTGGCTGCTTCTTCCCCAGC	Homo sapiens adlican (DKFZp564I1922), mRNA.											go_function: vascular endothelial growth factor receptor activity [goid 0005021] [evidence IEA]; go_function: ATP binding [goid 0005524] [evidence IEA]; go_process: protein amino acid phosphorylation [goid 0006468] [evidence IEA]
MMP1	NM_002421.2	435.77	122.13	3.57	4010068	GI_13027798	1874	GCAGTCACTGGTGTCACCCTGGATAGGCAAGGGATAACTCTTCTAACACA	Homo sapiens matrix metalloproteinase 1 (interstitial collagenase) (MMP1), mRNA.											go_component: extracellular matrix [goid 0005578] [evidence IEA]; go_component: extracellular space [goid 0005615] [evidence NR]; go_function: collagenase activity [goid 0008133] [evidence E] [pmid 3027129]; go_function: zinc ion binding [goid 0008270] [evidence TAS] [pmid 2167156]; go_function: interstitial collagenase activity [goid 0004232] [evidence IEA]; go_function: hydrolase activity [goid…
CSF1R	NM_005211.2	4514.2	1266.15	3.57	6290692	GI_27262658	3881	GGCCACACCAAGCAGGAAGCACAAACTCCCCCAAGCTGACTCATCCTAAC	Homo sapiens colony stimulating factor 1 receptor, formerly McDonough feline sarcoma viral (v-fms) oncogene homolog (CSF1R), mRNA.											go_component: integral to plasma membrane [goid 0005887] [evidence TAS] [pmid 2421165]; go_component: plasma membrane [goid 0005886] [evidence P] [pmid 2421165]; go_function: macrophage colony stimulating factor receptor activity [goid 0005011] [evidence TAS] [pmid 8981357]; go_function: ATP binding [goid 0005524] [evidence IEA]; go_function: receptor activity [goid 0004872] [evidence IEA]; go_fu…
OTOA	NM_170664.1	457.66	128.53	3.56	6020647	GI_24638451	2450	CTCCAGTCGTGGGGTCTTTGGCTTGGTTGTCCCCTGCTGGTTCTAATGGC	Homo sapiens otoancorin (OTOA), mRNA.
CCL13	NM_005408.2	694.97	196.08	3.54	6020156	GI_22538799	687	GAGAGCATGCCTGTGGGAGTCATGGACATGAAGGGATGCTGCAATGTAGG	Homo sapiens chemokine (C-C motif) ligand 13 (CCL13), mRNA.											go_component: membrane [goid 0016020] [evidence IEA]; go_component: extracellular space [goid 0005615] [evidence TAS] [pmid 9195948]; go_function: chemokine receptor activity [goid 0004950] [evidence NR]; go_function: chemokine activity [goid 0008009] [evidence TAS] [pmid 9558100]; go_function: receptor binding [goid 0005102] [evidence E] [pmid 9195948]; go_function: signal transducer activity [g…
STAB1	NM_015136.1	3198.33	903.75	3.54	6020195	GI_12225239	7673	GTGAACCCTTCGATGACTCACTGCTGGAGGAGGACTTCCCTGACACCCAG	Homo sapiens stabilin 1 (STAB1), mRNA.											go_function: hyaluronic acid binding [goid 0005540] [evidence IEA]; go_function: structural molecule activity [goid 0005198] [evidence IEA]; go_process: electron transport [goid 0006118] [evidence IEA]; go_process: cell adhesion [goid 0007155] [evidence IEA]
CD209	NM_021155.2	1150.01	325.08	3.54	50184	GI_22095359	4193	ACTTGGAGAGACAGATTTGGGCCAGACTCCTGTGTCCTTGCTTGGCTGCC	Homo sapiens CD209 antigen (CD209), mRNA.
KRT18	NM_000224.2	664.01	188.25	3.53	1240112	GI_40354193	1258	CCGCCTGCTGGAAGATGGCGAGGACTTTAATCTTGGTGATGCCTTGGACA	Homo sapiens keratin 18 (KRT18), transcript variant 1, mRNA.											go_component: intermediate filament [goid 0005882] [evidence TAS] [pmid 2434380]; go_component: kinesin complex [goid 0005871] [evidence IEA]; go_function: structural constituent of cytoskeleton [goid 0005200] [evidence NR]; go_process: embryogenesis and morphogenesis [goid 0007345] [evidence TAS] [pmid 2434380]; go_process: cell shape and cell size control [goid 0007148] [evidence NR]; go_proces…
C1QG	NM_172369.1	3996.76	1138.32	3.51	2970372	GI_27363487	797	ATGGTGGGCATCCAGGGCTCTGACAGCGTCTTCTCCGGCTTCCTGCTCTT	Homo sapiens complement component 1, q subcomponent, gamma polypeptide (C1QG), mRNA.											go_component: extracellular [goid 0005576] [evidence NAS] [pmid 9777412]; go_component: microfibril [goid 0001527] [evidence IEA]; go_function: defense/immunity protein activity [goid 0003793] [evidence NAS] [pmid 9777412]; go_process: complement activation, classical pathway [goid 0006958] [evidence IEA]; go_process: immune response [goid 0006955] [evidence NAS] [pmid 9777412]
ITGAM	NM_000632.2	789.24	225.03	3.51	5220546	GI_6006013	4386	GGTTTCCTTCAGACAGATTCCAGGCGATGTGCAAGTGTATGCACGTGTGC	Homo sapiens integrin, alpha M (complement component receptor 3, alpha; also known as CD11b (p170), macrophage antigen alpha polypeptide) (ITGAM), mRNA.											go_component: integrin complex [goid 0008305] [evidence P] [pmid 2563162]; go_function: cell adhesion receptor activity [goid 0004895] [evidence P] [pmid 2563162]; go_process: cell adhesion [goid 0007155] [evidence P] [pmid 2563162]
POSTN	NM_006475.1	1154.06	330.46	3.49	6620746	GI_5453833	2683	GAGAAACATGAGGGAAATTGTGGAGTTAGCCTCCTGTGGTAAAGGAATTG	Homo sapiens periostin, osteoblast specific factor (POSTN), mRNA.											go_component: extracellular matrix [goid 0005578] [evidence IEA]; go_function: cell adhesion molecule activity [goid 0005194] [evidence IEA] [pmid 8363580]; go_process: skeletal development [goid 0001501] [evidence TAS] [pmid 8363580]; go_process: cell adhesion [goid 0007155] [evidence IEA]
Z39IG	NM_007268.1	1420.93	408.04	3.48	6450129	GI_6005957	1358	ACCAACACTGGAGCCGCTGGGAGTCACTGGCTTTGCCCTGGAATTTGCCA	Homo sapiens Ig superfamily protein (Z39IG), mRNA.
SYK	NM_003177.3	758.98	218.83	3.47	3990546	GI_34147655	2497	AGGCAAAGGCAGAGGAATTTGGCTGCTTCTACGGCCATGAGACTGATCCC	Homo sapiens spleen tyrosine kinase (SYK), mRNA.											go_function: protein-tyrosine kinase activity [goid 0004713] [evidence TAS] [pmid 8163536]; go_function: ATP binding [goid 0005524] [evidence IEA]; go_function: transferase activity [goid 0016740] [evidence IEA]; go_process: protein amino acid phosphorylation [goid 0006468] [evidence TAS] [pmid 8163536]; go_process: histogenesis and organogenesis [goid 0007397] [evidence TAS] [pmid 7477352]; go_p…
CTSC	NM_148170.1	898.78	259.34	3.47	6420079	GI_22538439	236	CGGTTCCCAGCGCGATGTCAACTGCTCGGTTATGGGACCACAAGAAAAAA	Homo sapiens cathepsin C (CTSC), transcript variant 2, mRNA.											go_component: lysosome [goid 0005764] [evidence NR]; go_function: cysteine-type endopeptidase activity [goid 0004197] [evidence IEA]; go_function: dipeptidyl-peptidase I activity [goid 0004214] [evidence IEA]; go_function: hydrolase activity [goid 0016787] [evidence IEA]; go_process: proteolysis and peptidolysis [goid 0006508] [evidence NR]; go_process: immune response [goid 0006955] [evidence TA…
BCL2A1	NM_004049.2	533.96	154.1	3.47	7040136	GI_14574570	243	CCTACAGATACCACAACCTGGATCAGGTCCAAGCAAAACGTCCAGAGTGC	Homo sapiens BCL2-related protein A1 (BCL2A1), mRNA.											go_function: apoptosis inhibitor activity [goid 0008189] [evidence TAS] [pmid 8605321]; go_process: anti-apoptosis [goid 0006916] [evidence TAS] [pmid 8605321]; go_process: apoptosis [goid 0006915] [evidence IEA]
LILRB3	NM_006864.1	916.04	264.62	3.46	4050195	GI_5803059	2063	CCATGAGGAGACGCTGGGAACTTGTGGGACTCACCTGACTCAAAGATGAC	Homo sapiens leukocyte immunoglobulin-like receptor, subfamily B (with TM and ITIM domains), member 3 (LILRB3), mRNA.											go_component: integral to plasma membrane [goid 0005887] [evidence TAS] [pmid 9278324]; go_component: integral to membrane [goid 0016021] [evidence IEA]; go_function: defense/immunity protein activity [goid 0003793] [evidence TAS] [pmid 9278324]; go_function: transmembrane receptor activity [goid 0004888] [evidence TAS] [pmid 9278324]; go_function: receptor activity [goid 0004872] [evidence IEA] …
SLC1A3	NM_004172.3	929.86	269.63	3.45	3940270	GI_34222301	3802	TATGGAAAGGTCCTGTGGGGAGCCCATCATCTCGCCAAGCCATCACAGGC	Homo sapiens solute carrier family 1 (glial high affinity glutamate transporter), member 3 (SLC1A3), mRNA.											go_component: integral to membrane [goid 0016021] [evidence IEA]; go_component: membrane fraction [goid 0005624] [evidence TAS] [pmid 7521911]; go_function: L-glutamate transporter activity [goid 0005313] [evidence E] [pmid 7521911]; go_function: glutamate/aspartate:sodium symporter activity [goid 0015372] [evidence TAS] [pmid 8647279]; go_function: sodium:dicarboxylate/tricarboxylate symporter a…
KIAA1913	NM_052913.2	639.66	185.72	3.44	2690484	GI_40538800	4727	TCTGTTACTGTCCAATAGCACCTCATTCCCACATTCTATTTTCCCCCGGT	Homo sapiens KIAA1913 (KIAA1913), mRNA.
SAT	NM_002970.1	5269.94	1530.62	3.44	6400717	GI_4506788	666	GGCAACAGAGGAGTGAGGAGTGCTGCTGTAGATGACAACCTCCATTCTAT	Homo sapiens spermidine/spermine N1-acetyltransferase (SAT), mRNA.											go_function: diamine N-acetyltransferase activity [goid 0004145] [evidence TAS] [pmid 1985966]; go_function: acyltransferase activity [goid 0008415] [evidence IEA]; go_function: transferase activity [goid 0016740] [evidence IEA]
CA12	NM_001218.2	598	173.98	3.44	2230309	GI_9951924	2505	GACTGAGAAGGAACCGACCCCTAGTTGAGAGCACCTTGCAGTTCCCCGAG	Homo sapiens carbonic anhydrase XII (CA12), mRNA.											go_component: integral to membrane [goid 0016021] [evidence TAS] [pmid 9636197]; go_function: carbonate dehydratase activity [goid 0004089] [evidence TAS] [pmid 9636197]; go_function: zinc ion binding [goid 0008270] [evidence TAS] [pmid 9636197]; go_function: lyase activity [goid 0016829] [evidence IEA]; go_process: one-carbon compound metabolism [goid 0006730] [evidence IEA]
RPLP0	NM_053275.2	348.89	101.79	3.43	460093	GI_34335144	6	GACCGCGGGATGGGTGTCGGCGTGACCAGGCCTGAGCTCCCTGTCTCTCC	Homo sapiens ribosomal protein, large, P0 (RPLP0), transcript variant 2, mRNA.											go_component: cytosolic large ribosomal subunit (sensu Eukarya) [goid 0005842] [evidence TAS] [pmid 3323886]; go_component: ribosome [goid 0005840] [evidence IEA]; go_component: intracellular [goid 0005622] [evidence IEA]; go_function: structural protein of ribosome [goid 0003735] [evidence E] [pmid 3323886]; go_function: RNA binding [goid 0003723] [evidence TAS] [pmid 3323886]; go_function: stru…
ASC	NM_145183.1	2189.23	639.45	3.42	50195	GI_22035621	651	CTCCTTCCCAGCAACACTCCGGTCAGCCCCTGGCAATCCCACCAAATCAT	Homo sapiens apoptosis-associated speck-like protein containing a CARD (ASC), transcript variant 3, mRNA.											go_component: intracellular [goid 0005622] [evidence IEA]; go_function: apoptosis regulator activity [goid 0016329] [evidence IEA]; go_process: induction of apoptosis [goid 0006917] [evidence TAS] [pmid 10567338]; go_process: cell growth and/or maintenance [goid 0008151] [evidence IEA]; go_process: negative regulation of cell cycle [goid 0045786] [evidence IEA]; go_process: apoptosis [goid 000691…
RPL30	NM_000989.2	6042.34	1765.95	3.42	630278	GI_15812218	20	ATCTTAGCGGCTGCTGTTGGTTGGGGGCCGTCCCGCTCCTAAGGCAGGAA	Homo sapiens ribosomal protein L30 (RPL30), mRNA.											go_component: cytosolic large ribosomal subunit (sensu Eukarya) [goid 0005842] [evidence TAS] [pmid 1577483]; go_component: ribosome [goid 0005840] [evidence IEA]; go_component: intracellular [goid 0005622] [evidence IEA]; go_function: structural protein of ribosome [goid 0003735] [evidence P] [pmid 1577483]; go_function: RNA binding [goid 0003723] [evidence TAS] [pmid 1577483]; go_function: stru…
UBC	NM_021009.1	5697.38	1666.76	3.42	2060215	GI_20149305	1856	GGTTGATCTTTGCCGGAAAGCAGCTGGAAGATGGGCGGACCCTGTCTGAC	Homo sapiens ubiquitin C (UBC), mRNA.											DNA
MPEG1	XM_166227.4	1263.33	370.86	3.41	4120215	GI_42659661	4230	AGGCTCTGCCTTCCAAGTCCTGGGTTCCTAACTGGTGACCTTAGCCTGGG	Homo sapiens macrophage expressed gene 1 (MPEG1), mRNA.
MAPK13	NM_002754.3	392.45	115.74	3.39	3170440	GI_20986527	1661	CTTGGCTCTTTTTAGCTTGTGGCGGCAGTGGGCAGTCCGTGGCATTCCCC	Homo sapiens mitogen-activated protein kinase 13 (MAPK13), mRNA.											go_function: MAP kinase activity [goid 0004707] [evidence TAS] [pmid 9218798]; go_function: cAMP-dependent protein kinase activity [goid 0004691] [evidence IEA]; go_function: protein kinase CK2 activity [goid 0004682] [evidence IEA]; go_function: ATP binding [goid 0005524] [evidence IEA]; go_function: protein serine/threonine kinase activity [goid 0004674] [evidence IEA]; go_function: MP kinase a…
CD4	NM_000616.2	600.33	178.37	3.37	2320156	GI_21314613	2889	TCCAGGAAGACCCCCCTATTGCTGCTGGGGCTCCCCATTTGCTTACTTTG	Homo sapiens CD4 antigen (p55) (CD4), mRNA.											go_component: integral to membrane [goid 0016021] [evidence IEA]; go_component: T-cell receptor complex [goid 0042101] [evidence NAS] [pmid 8512039]; go_component: plasma membrane [goid 0005886] [evidence TAS]; go_function: internalization receptor activity [goid 0015029] [evidence TAS] [pmid 10438529]; go_function: coreceptor activity [goid 0015026] [evidence NAS] [pmid 8512039]; go_function: tr…
CCL4	NM_002984.1	1920.11	571.7	3.36	130441	GI_4506844	439	TCTCCATGAGACACATCTCCTCCATACTCAGGACTCCTCTCCGCAGTTCC	Homo sapiens chemokine (C-C motif) ligand 4 (CCL4), mRNA.											go_component: extracellular space [goid 0005615] [evidence TAS] [pmid 2521882]; go_function: cytokine activity [goid 0005125] [evidence P] [pmid 2462251]; go_function: receptor signaling protein tyrosine kinase activity [goid 0004716] [evidence TAS] [pmid 9973507]; go_function: chemokine activity [goid 0008009] [evidence TAS] [pmid 10929056]; go_process: viral replication [goid 0008166] [evidence…
HN1	NM_016185.1	890.98	267.67	3.33	5290300	GI_7705876	546	AGTCCAGCCTCGTCTTGGGTTAGCTCTGACTGTCCTGAACGCTGTCGTTC	Homo sapiens hematological and neurological expressed 1 (HN1), mRNA.
MGC24133	NM_174896.2	1626.72	491.27	3.31	5720441	GI_31341350	765	TGGGGGCATAGACTGCCTTCCTTGGACCCTTCCAAAGTGTGTGGTACGGG	Homo sapiens hypothetical protein MGC24133 (MGC24133), mRNA.
DOCK2	NM_004946.1	1280.77	386.97	3.31	2030026	GI_31377467	5780	GAATGCCTTCTCCCAGTGTGCTCTCCCCAACATCCTAGGCACAGCTTTCA	Homo sapiens dedicator of cytokinesis 2 (DOCK2), mRNA.											go_component: cytoplasm [goid 0005737] [evidence P]; go_component: membrane [goid 0016020] [evidence IEA]; go_component: cytoskeleton [goid 0005856] [evidence IEA]; go_function: GTPase activator activity [goid 0005096] [evidence E]; go_process: small GTPase mediated signal transduction [goid 0007264] [evidence E]
LIMK1	NM_016735.1	1055.14	318.93	3.31	2030541	GI_8051614	3193	ACCCCCATCCAGGAACCGTGACGTCCAAGGAACCAAACCCAGACGCAGAA	Homo sapiens LIM domain kinase 1 (LIMK1), transcript variant dLIMK, mRNA.											go_component: cytoplasm [goid 0005737] [evidence TAS] [pmid 8537403]; go_function: protein serine/threonine kinase activity [goid 0004674] [evidence TAS] [pmid 8537403]; go_function: protein kinase activity [goid 0004672] [evidence NR]; go_function: cAMP-dependent protein kinase activity [goid 0004691] [evidence IEA]; go_function: protein kinase CK2 activity [goid 0004682] [evidence IEA]; go_func…
HLA-DRB5	NM_002125.3	4521.75	1367.93	3.31	450332	GI_26665892	1051	ACGGCCTCCCATGCATCTGTACTCCCCCTGTGTGCCACAAATGCACTACG	Homo sapiens major histocompatibility complex, class II, DR beta 5 (HLA-DRB5), mRNA.											go_component: integral to plasma membrane [goid 0005887] [evidence P] [pmid 3456344]; go_function: class II major histocompatibility complex antigen [goid 0003821] [evidence P] [pmid 3456344]; go_process: perception of pest/pathogen/parasite [goid 0009596] [evidence P] [pmid 3456344]
GPSN2	NM_138501.3	576.29	174.34	3.31	2970053	GI_34222216	459	GTGCACCTCGCCTGCATCTGTCACTCATTCCACTACATCAAGCGCCTGCT	Homo sapiens glycoprotein, synaptic 2 (GPSN2), mRNA.											go_component: integral to membrane [goid 0016021] [evidence IEA]
CCL2	NM_002982.2	1835.46	556.39	3.3	5860408	GI_22538812	387	CCCAAGAATCTGCAGCTAACTTATTTTCCCCTAGCTTTCCCCAGACACCC	Homo sapiens chemokine (C-C motif) ligand 2 (CCL2), mRNA.											go_component: membrane [goid 0016020] [evidence IEA]; go_component: extracellular space [goid 0005615] [evidence TAS]; go_function: chemokine activity [goid 0008009] [evidence TAS] [pmid 10623817]; go_function: receptor binding [goid 0005102] [evidence E]; go_function: protein kinase activity [goid 0004672] [evidence TAS] [pmid 9973507]; go_function: signal transducer activity [goid 0004871] [evi…
C3AR1	NM_004054.2	716.59	217.46	3.3	5390632	GI_21314629	1534	CTGTGTGAAAATGTGGAGCAGCCAACAAGCAGGGGCTCTTAGGCAATCAC	Homo sapiens complement component 3a receptor 1 (C3AR1), mRNA.											go_component: integral to plasma membrane [goid 0005887] [evidence TAS] [pmid 8702752]; go_component: plasma membrane [goid 0005886] [evidence E] [pmid 8702752]; go_function: complement component C3a receptor activity [goid 0004876] [evidence TAS] [pmid 8765043]; go_function: C3a anaphylatoxin receptor activity [goid 0004943] [evidence TAS] [pmid 8702752]; go_function: G-protein coupled receptor …
SLC22A18	NM_002555.3	1150.99	351.99	3.27	5080278	GI_34734074	1478	GACCGCTGCCCAGACACAGACTGGCAATAAACTCCTACTAAATCCCTCCG	Homo sapiens solute carrier family 22 (organic cation transporter), member 18 (SLC22A18), transcript variant 1, mRNA.											go_component: integral to membrane [goid 0016021] [evidence IEA] [pmid 9499412]; go_component: plasma membrane [goid 0005886] [evidence E] [pmid 9744804]; go_function: organic cation transporter activity [goid 0015101] [evidence NR]; go_function: transporter activity [goid 0005215] [evidence P] [pmid 9499412]; go_function: tetracycline:hydrogen antiporter activity [goid 0015520] [evidence IEA]; g…
CD84	NM_003874.1	437.07	133.9	3.26	3060053	GI_4502686	2718	TCACAGTCCCTTGCCTATGTGTGGCAGAGTGTCCCAGCCAGATGTGTGCC	Homo sapiens CD84 antigen (leukocyte antigen) (CD84), mRNA.											go_component: integral to plasma membrane [goid 0005887] [evidence P] [pmid 9310491]; go_component: plasma membrane [goid 0005886] [evidence E] [pmid 9310491]; go_function: lymphocyte antigen [goid 0005557] [evidence E] [pmid 9310491]; go_process: homophilic cell adhesion [goid 0007156] [evidence P] [pmid 7797269]; go_process: defense response [goid 0006952] [evidence P] [pmid 9310491]
ADORA3	NM_000677.2	938.39	287.79	3.26	380576	GI_6031156	2054	AGGCTCTAGTTGGGCTGAACATGTGTGTGGTGGTGACTCATTTCCATGCC	Homo sapiens adenosine A3 receptor (ADORA3), mRNA.											go_component: integral to plasma membrane [goid 0005887] [evidence TAS] [pmid 8399349]; go_function: adenosine receptor [goid 0008501] [evidence E]; go_function: A3 adenosine receptor activity, G-protein coupled [goid 0001613] [evidence IEA]; go_function: rhodopsin-like receptor activity [goid 0001584] [evidence IEA]; go_process: regulation of heart rate [goid 0008016] [evidence TAS] [pmid 983786…
AIF1	NM_001623.3	1858.95	570.59	3.26	2370338	GI_14574567	43	GTCTCCCCACCTCTACCAGCATCTGCTGAGCTATGAGCCAAACCAGGGAT	Homo sapiens allograft inflammatory factor 1 (AIF1), transcript variant 3, mRNA.											go_component: nucleus [goid 0005634] [evidence P] [pmid 9614071]; go_process: cell cycle arrest [goid 0007050] [evidence E] [pmid 9614071]; go_process: negative regulation of cell proliferation [goid 0008285] [evidence E] [pmid 9614071]; go_process: response to stress [goid 0006950] [evidence E] [pmid 9614071]; go_process: inflammatory response [goid 0006954] [evidence E] [pmid 8912632]
PSCD4	NM_013385.2	994.88	305.56	3.26	6770433	GI_8670549	3040	CTGTCCTGCTCCTGGGATGCACTGGCTACTCCCTTAGTCTACTCCCTTCC	Homo sapiens pleckstrin homology, Sec7 and coiled-coil domains 4 (PSCD4), mRNA.											go_function: ARF guanyl-nucleotide exchange factor activity [goid 0005086] [evidence TAS] [pmid 10652308]
KLHL6	NM_130446.1	388.81	119.67	3.25	3610403	GI_18482382	4899	GGTCTCAATGGCTTCGGGAAACACACATATACACATACACCATGCCCTTG	Homo sapiens kelch-like 6 (Drosophila) (KLHL6), mRNA.											go_function: protein binding [goid 0005515] [evidence IEA]
ENG	NM_000118.1	1938.92	597.02	3.25	5860711	GI_4557554	2700	GCCCAGGAGACAGACCACTTGCCACGCTGTTGTAAAAACCCAAGTCCCTG	Homo sapiens endoglin (Osler-Rendu-Weber syndrome 1) (ENG), mRNA.											go_component: integral to plasma membrane [goid 0005887] [evidence TAS] [pmid 7894484]; go_function: protein binding [goid 0005515] [evidence TAS] [pmid 8194490]; go_function: cell adhesion molecule activity [goid 0005194] [evidence IEA]; go_process: circulation [goid 0008015] [evidence TAS] [pmid 7894484]; go_process: histogenesis and organogenesis [goid 0007397] [evidence TAS] [pmid 10348742]; …
SCARB1	NM_005505.3	915.25	282.11	3.24	5670270	GI_33620766	2438	GGGCGCTCCTGGACCCTGGGGCAAACCTGTGACCCTTTTCTACTGGAATA	Homo sapiens scavenger receptor class B, member 1 (SCARB1), mRNA.											go_component: membrane [goid 0016020] [evidence IEA]; go_component: microfibril [goid 0001527] [evidence IEA]; go_component: membrane fraction [goid 0005624] [evidence NR]; go_component: plasma membrane [goid 0005886] [evidence E] [pmid 7689561]; go_component: integral to membrane [goid 0016021] [evidence IEA]; go_function: transporter activity [goid 0005215] [evidence E]; go_function: receptor a…
LOXL2	NM_002318.1	700.43	216.23	3.24	670215	GI_4505010	3313	GGGTTTTTGATTCAACGGTGCTATAACCAGGGTCCTGGGTGACAGGGCGC	Homo sapiens lysyl oxidase-like 2 (LOXL2), mRNA.											go_component: membrane [goid 0016020] [evidence IEA]; go_component: extracellular space [goid 0005615] [evidence TAS] [pmid 9079631]; go_function: electron transporter activity [goid 0005489] [evidence TAS] [pmid 9079631]; go_function: protein-lysine 6-oxidase activity [goid 0004720] [evidence IEA]; go_function: scavenger receptor activity [goid 0005044] [evidence IEA]; go_function: copper ion bi…
DAB2	NM_001343.1	2533.26	784.13	3.23	2480427	GI_4503250	2763	GAACACCTGCCTTCTACCCTCTGGTTGGGAGATGCAGCCACCACATCCCT	Homo sapiens disabled homolog 2, mitogen-responsive phosphoprotein (Drosophila) (DAB2), mRNA.											go_component: nucleus [goid 0005634] [evidence IEA]; go_function: tumor suppressor [goid 0008181] [evidence TAS] [pmid 9620555]; go_function: DNA binding [goid 0003677] [evidence IEA]; go_process: cell proliferation [goid 0008283] [evidence TAS] [pmid 9620555]; go_process: regulation of transcription, DNA-dependent [goid 0006355] [evidence IEA]
CD68	NM_001251.1	417.42	129.76	3.22	1980528	GI_4557434	1439	AGTGAGCCTGTCATCGCTCCACTGAGCCAAGATCGCTCCCACTGCACTCC	Homo sapiens CD68 antigen (CD68), mRNA.											go_component: lysosome [goid 0005764] [evidence IEA]; go_component: integral to membrane [goid 0016021] [evidence TAS] [pmid 7680921]; go_component: membrane fraction [goid 0005624] [evidence TAS] [pmid 7680921]
LMNA	NM_005572.2	1236.15	385.48	3.21	2970021	GI_27436944	1653	TACCGGTTCCCACCAAAGTTCACCCTGAAGGCTGGGCAGGTGGTGACGAT	Homo sapiens lamin A/C (LMNA), transcript variant 2, mRNA.											go_component: nuclear lamina [goid 0005652] [evidence P] [pmid 3453101]; go_component: lamin filament [goid 0005638] [evidence TAS] [pmid 10080180]; go_component: kinesin complex [goid 0005871] [evidence IEA]; go_component: nucleus [goid 0005634] [evidence IEA]; go_function: structural molecule activity [goid 0005198] [evidence TAS] [pmid 8344919]; go_process: muscle development [goid 0007517] [e…
CLN2	NM_000391.2	4551.46	1420.62	3.2	2470463	GI_5597012	3362	GGCCAGTTTACTTGTCTGCCTTCCTTTCCAAGACCGTTGGTGCCTAGAGG	Homo sapiens ceroid-lipofuscinosis, neuronal 2, late infantile (Jansky-Bielschowsky disease) (CLN2), mRNA.											go_component: lysosome [goid 0005764] [evidence TAS] [pmid 9295267]; go_function: peptidase activity [goid 0008233] [evidence TAS] [pmid 9295267]; go_function: serine-type endopeptidase activity [goid 0004252] [evidence IEA]; go_function: tripeptidyl-peptidase I activity [goid 0019131] [evidence IEA]; go_process: proteolysis and peptidolysis [goid 0006508] [evidence TAS] [pmid 9295267]; go_proces…
TFRC	NM_003234.1	1265.97	395.95	3.2	2260465	GI_4507456	4721	GTGAAAAGGTCATAGCTGAGATTCCTGGTTCGGGTGTTACGCACACGTAC	Homo sapiens transferrin receptor (p90, CD71) (TFRC), mRNA.											go_component: endosome [goid 0005768] [evidence TAS] [pmid 8394993]; go_component: extracellular [goid 0005576] [evidence IDA] [pmid 1871153]; go_component: integral to plasma membrane [goid 0005887] [evidence TAS] [pmid 6090955]; go_function: transferrin receptor activity [goid 0004998] [evidence NAS] [pmid 1871153]; go_function: peptidase activity [goid 0008233] [evidence IEA]; go_function: rec…
CD83	NM_004233.2	879.38	276.05	3.19	1570053	GI_24475618	2066	GGGGAAGTGAGGAAGCCAGGTCCACGGTCTGTTCTTGAAGCAGTAGCCTA	Homo sapiens CD83 antigen (activated B lymphocytes, immunoglobulin superfamily) (CD83), mRNA.											go_component: integral to plasma membrane [goid 0005887] [evidence TAS] [pmid 8422464]; go_component: plasma membrane [goid 0005886] [evidence E] [pmid 9310491]; go_function: lymphocyte antigen [goid 0005557] [evidence TAS] [pmid 9310491]; go_process: humoral immune response [goid 0006959] [evidence TAS] [pmid 8422464]; go_process: defense response [goid 0006952] [evidence TAS] [pmid 1378080]; go…
C20orf59	NM_022082.2	690.88	216.96	3.18	3120373	GI_31542262	2432	CTGGCGTTCTTTCTACCTCCCTTTTCGTTGCCTGAGGAGCTGGTGGTTTC	Homo sapiens chromosome 20 open reading frame 59 (C20orf59), mRNA.
COTL1	NM_021149.2	3301.82	1044.87	3.16	3120181	GI_23510452	1568	CCTGGGCTCACAGCACCCCAAAAGCCTGTGGCTTCAGTCCTGCGTCTGCA	Homo sapiens coactosin-like 1 (Dictyostelium) (COTL1), mRNA.											go_component: cytoskeleton [goid 0005856] [evidence IEA]; go_component: intracellular [goid 0005622] [evidence IEA]; go_component: cellular_component unknown [goid 0008372] [evidence ND]; go_component: actin cytoskeleton [goid 0015629] [evidence P] [pmid 10051563]; go_function: protein binding [goid 0005515] [evidence E] [pmid 10051563]; go_function: actin binding [goid 0003779] [evidence IDA] [p…
LYN	NM_002350.1	1539.74	487.65	3.16	3390019	GI_4505054	2054	CCTCAGCAGCTGGTAATCTTGCTCTGCTTGACAACATCTGAGTGCAGCCG	Homo sapiens v-yes-1 Yamaguchi sarcoma viral related oncogene homolog (LYN), mRNA.											go_component: peripheral plasma membrane protein [goid 0000157] [evidence E]; go_function: protein-tyrosine kinase activity [goid 0004713] [evidence P] [pmid 3561390]; go_function: receptor signaling protein tyrosine kinase activity [goid 0004716] [evidence TAS] [pmid 10748115]; go_function: ATP binding [goid 0005524] [evidence IEA]; go_function: transferase activity [goid 0016740] [evidence IEA]…
C1orf38	NM_004848.1	738.18	235.49	3.13	1190725	GI_4758579	2047	CCCGGGAGGCCTGGACTGTCTTCCTCATCTCTGTAGCACCAAGCCTGATA	Homo sapiens chromosome 1 open reading frame 38 (C1orf38), mRNA.											go_process: cell adhesion [goid 0007155] [evidence P] [pmid 9563507]
SLCO2A1	NM_005630.1	780.32	249.92	3.12	3120619	GI_5032094	3831	GGTTCTGCTTGGAAAATGATGCCCTGCAACTAACCCTGGTCTTTCCCATG	Homo sapiens solute carrier organic anion transporter family, member 2A1 (SLCO2A1), mRNA.											go_component: membrane fraction [goid 0005624] [evidence TAS] [pmid 8787677]; go_component: integral to plasma membrane [goid 0005887] [evidence TAS] [pmid 8787677]; go_function: lipid transporter activity [goid 0005319] [evidence TAS] [pmid 8787677]; go_process: lipid transport [goid 0006869] [evidence TAS] [pmid 8787677]
HEM1	NM_005337.2	484.96	155.42	3.12	6520097	GI_34485726	3600	CAATCCAGGGCTGAGAAATCGTAGAGCAGTGAGGCAGGCTGGGAGCATGG	Homo sapiens hematopoietic protein 1 (HEM1), mRNA.											go_component: membrane fraction [goid 0005624] [evidence TAS] [pmid 1932118]; go_component: integral to plasma membrane [goid 0005887] [evidence TAS] [pmid 1932118]
CTSH	NM_148979.1	800.05	256.65	3.12	510673	GI_23110956	1159	GAGATCCACTGGGACCCCCAACATTCTGCCCTCACCTCTGTGCCCAGCCT	Homo sapiens cathepsin H (CTSH), transcript variant 2, mRNA.											go_component: lysosome [goid 0005764] [evidence NR]; go_function: cathepsin H activity [goid 0004215] [evidence TAS] [pmid 2849458]; go_function: cysteine-type peptidase activity [goid 0008234] [evidence P] [pmid 2587265]; go_function: hydrolase activity [goid 0016787] [evidence IEA]; go_process: proteolysis and peptidolysis [goid 0006508] [evidence TAS] [pmid 2849458]
SH3BP1	NM_018957.2	992.66	319.78	3.1	110148	GI_15147251	2277	GGAGAGGTTTGCCTGCTCCTACGGGACTGATTCTTCTCTTGCCGACATGT	Homo sapiens SH3-domain binding protein 1 (SH3BP1), mRNA.
TPT1	NM_003295.1	13077.7	4219.22	3.1	450647	GI_4507668	158	GAGATCGCGGACGGGTTGTGCCTGGAGGTGGAGGGGAAGATGGTCAGTAG	Homo sapiens tumor protein, translationally-controlled 1 (TPT1), mRNA.											go_component: cytoplasm [goid 0005737] [evidence IEA]; go_component: extracellular space [goid 0005615] [evidence TAS] [pmid 7542803]; go_function: molecular_function unknown [goid 0005554] [evidence IEA]
LOC283698	XM_208108.3	360.49	116.42	3.1	7050204	GI_37540765	320	TGGCCTCGGCCTTCTTGGTGGTCGACGCGTATTTCCCCCAGATCAGCAAC	Homo sapiens similar to synaptogyrin 2; cellugyrin (LOC283698), mRNA.
TIMP2	NM_003255.2	1162.18	375.6	3.09	520390	GI_9257247	817	GCCTCTGGATGGACTGGGTCACAGAGAAGAACATCAACGGGCACCAGGCC	Homo sapiens tissue inhibitor of metalloproteinase 2 (TIMP2), mRNA.											go_function: metalloendopeptidase inhibitor activity [goid 0008191] [evidence P] [pmid 8810321]
DHRS9	NM_005771.3	631.48	204.47	3.09	1450037	GI_40548399	2744	GCCCATTCAAAATGATCTTTACCGTGGCCTGCCCCATGCTTATGGTCCCC	Homo sapiens dehydrogenase/reductase (SDR family) member 9 (DHRS9), transcript variant 1, mRNA.
HLA-DPA1	NM_033554.2	14233.9	4615.92	3.08	70180	GI_24797073	920	GAAAACTACTCCAGTGGCTGACTGAATTGCTGACCCTTCAAGCTCTGTCC	Homo sapiens major histocompatibility complex, class II, DP alpha 1 (HLA-DPA1), mRNA.											go_component: integral to plasma membrane [goid 0005887] [evidence NAS] [pmid 2461352]; go_function: MHC class II receptor activity [goid 0045012] [evidence NAS] [pmid 2461352]; go_process: immune response [goid 0006955] [evidence NAS] [pmid 2461352]; go_process: antigen presentation, exogenous antigen [goid 0019884] [evidence IEA]; go_process: antigen processing, exogenous antigen via MHC class …
ZMYND15	NM_032265.1	541.76	176.44	3.07	1400161	GI_14149998	2139	CCGGCGGAAATGAATGCTGATACCCTAGTAGTCCCCAGCTCCCAAACACT	Homo sapiens zinc finger, MYND domain containing 15 (ZMYND15), mRNA.
GGA1	NM_013365.2	649.82	212.17	3.06	2810400	GI_20336261	2411	GACGCCTACACCCCCAGCTATTTGCACTCTGGTGTGTGGTTTGACTCTGC	Homo sapiens golgi associated, gamma adaptin ear containing, ARF binding protein 1 (GGA1), mRNA.											go_component: kinesin complex [goid 0005871] [evidence IEA]; go_component: Golgi stack [goid 0005795] [evidence IEA]; go_function: protein transporter activity [goid 0008565] [evidence IEA]; go_function: molecular_function unknown [goid 0005554] [evidence ND]; go_process: intra-Golgi transport [goid 0006891] [evidence IEA]; go_process: intracellular protein transport [goid 0006886] [evidence TAS]
HSPA8	NM_006597.3	3214.15	1049.63	3.06	1400273	GI_24234684	1670	AGCAGAGGGACAAGGTGTCATCCAAGAATTCACTTGAGTCCTATGCCTTC	Homo sapiens heat shock 70kDa protein 8 (HSPA8), transcript variant 1, mRNA.											go_component: intracellular [goid 0005622] [evidence NAS] [pmid 8713105]; go_function: ATP binding [goid 0005524] [evidence IEA]; go_function: heat shock protein activity [goid 0003773] [evidence IEA]; go_function: non-chaperonin molecular chaperone ATPase activity [goid 0008571] [evidence NAS] [pmid 8530083]; go_process: protein folding [goid 0006457] [evidence NAS] [pmid 8530083]
MMP11	NM_005940.2	485.73	159.36	3.05	7040671	GI_13027795	2106	TACCTCAATCCTGTCCCAGGCCGGATCCTCCTGAAGCCCTTTTCGCAGCA	Homo sapiens matrix metalloproteinase 11 (stromelysin 3) (MMP11), mRNA.											go_component: extracellular matrix [goid 0005578] [evidence TAS] [pmid 1701851]; go_function: stromelysin 3 activity [goid 0004249] [evidence TAS] [pmid 7746327]; go_function: zinc ion binding [goid 0008270] [evidence IEA]; go_function: hydrolase activity [goid 0016787] [evidence IEA]; go_function: calcium ion binding [goid 0005509] [evidence IEA]; go_process: proteolysis and peptidolysis [goid 0…
CRTAC1	NM_018058.2	485.03	159.23	3.05	4670377	GI_42415498	2052	GGCCTGGGAGCTAGACCCTCCCCAAGCCCATCCATGCACATTACTTAGCT	Homo sapiens cartilage acidic protein 1 (CRTAC1), mRNA.
LOC94105	NM_033209.2	519.8	171.03	3.04	2120600	GI_24475732	1245	CCAGGAAAGCAGCGCTAGTGGAGGGTTGGAGAAGGAGGTAAAGGATGAGG	Homo sapiens Thy-1 co-transcribed (LOC94105), mRNA.											go_component: cellular_component unknown [goid 0008372] [evidence ND]; go_function: molecular_function unknown [goid 0005554] [evidence ND]; go_process: biological_process unknown [goid 0000004] [evidence ND]
HLA-DRB4	NM_021983.3	4878.58	1606.98	3.04	870484	GI_18641372	988	TAGCTCCTGTTCTTGGCCTGAAGCCTCACAGCTTTGATGGCAGTGCCTCA	Homo sapiens major histocompatibility complex, class II, DR beta 4 (HLA-DRB4), mRNA.											go_component: integral to plasma membrane [goid 0005887] [evidence NR]; go_function: class II major histocompatibility complex antigen [goid 0003821] [evidence NR]; go_process: signal transduction [goid 0007165] [evidence NR]
SLC2A5	NM_003039.1	441.11	146.05	3.02	6550010	GI_4507012	1825	CTCCACTTTGCTGGTTCAGCCTTCGTGTGGCTCCTGGTAACGTGGCTCCA	Homo sapiens solute carrier family 2 (facilitated glucose/fructose transporter), member 5 (SLC2A5), mRNA.											go_component: integral to membrane [goid 0016021] [evidence IEA]; go_component: plasma membrane [goid 0005886] [evidence TAS] [pmid 1634504]; go_function: fructose transporter activity [goid 0005353] [evidence TAS] [pmid 1634504]; go_function: glucose transporter activity [goid 0005355] [evidence TAS] [pmid 1695905]; go_function: transporter activity [goid 0005215] [evidence IEA]; go_function: su…
FGR	NM_005248.1	645.12	213.88	3.02	2450348	GI_4885234	2180	AGGAAAAGTCTTGGCTGGACCCCTTTCCTGCTGGGTGGATGCAGTGGTCC	Homo sapiens Gardner-Rasheed feline sarcoma viral (v-fgr) oncogene homolog (FGR), mRNA.											go_function: protein-tyrosine kinase activity [goid 0004713] [evidence TAS] [pmid 3003578]; go_function: ATP binding [goid 0005524] [evidence IEA]; go_function: transferase activity [goid 0016740] [evidence IEA]; go_process: response to virus [goid 0009615] [evidence TAS] [pmid 3003578]; go_process: protein amino acid phosphorylation [goid 0006468] [evidence TAS] [pmid 2995972]; go_process: oncog…
SDS	NM_006843.2	283.97	94.21	3.01	4480026	GI_33469957	1497	TTGAGGAACCATCTCAGCCATCCTCCCAGGAAGCCCACCCCTGACCCTTA	Homo sapiens serine dehydratase (SDS), mRNA.											go_function: L-serine ammonia-lyase activity [goid 0003941] [evidence TAS] [pmid 2674117]; go_function: lyase activity [goid 0016829] [evidence IEA]; go_process: L-serine metabolism [goid 0006563] [evidence TAS] [pmid 2674117]; go_process: gluconeogenesis [goid 0006094] [evidence IEA]; go_process: amino acid metabolism [goid 0006520] [evidence IEA]
FCGBP	NM_003890.1	3917.38	1304.06	3	6110364	GI_4503680	16299	TGCATCATGTGCTCCTACCCTGCTCTACCGCTTTTCTGGGTCACAGAGGC	Homo sapiens Fc fragment of IgG binding protein (FCGBP), mRNA.											go_function: protein binding [goid 0005515] [evidence E] [pmid 9182547]; go_process: immune response [goid 0006955] [evidence P] [pmid 9182547]
SLC16A3	NM_004207.1	384.37	128.44	2.99	6200707	GI_4759111	1918	CCCCTGGAAGATGGAAATAAACCTGCGTGTGGGTGGAGTGTTCTCGTGCC	Homo sapiens solute carrier family 16 (monocarboxylic acid transporters), member 3 (SLC16A3), mRNA.											go_component: membrane fraction [goid 0005624] [evidence TAS] [pmid 9425115]; go_component: integral to plasma membrane [goid 0005887] [evidence TAS] [pmid 9425115]; go_function: monocarboxylic acid transporter activity [goid 0008028] [evidence TAS] [pmid 9425115]; go_function: monocarboxylate porter activity [goid 0015355] [evidence IEA]; go_function: symporter activity [goid 0015293] [evidence …
TPM4	NM_003290.1	3086.17	1032.14	2.99	6100041	GI_4507650	1845	TGACCCACTCAGCAGGAATATGGTGGAGTTCAGTCCAATTCAGGTCAGCC	Homo sapiens tropomyosin 4 (TPM4), mRNA.											go_component: muscle thin filament tropomyosin [goid 0005862] [evidence TAS] [pmid 8641132]; go_component: kinesin complex [goid 0005871] [evidence IEA]; go_component: cytoskeleton [goid 0005856] [evidence IEA]; go_function: structural constituent of muscle [goid 0008307] [evidence TAS] [pmid 8641132]; go_function: actin binding [goid 0003779] [evidence IEA]; go_process: muscle development [goid …
NCF4	NM_000631.2	1386.04	463.58	2.99	6100139	GI_7382494	1218	ACCTTCAGCTCTCAGAGGAGATTGGGACCAGGAAAACCTGGGAGGATGGG	Homo sapiens neutrophil cytosolic factor 4, 40kDa (NCF4), transcript variant 1, mRNA.											go_component: cytosol [goid 0005829] [evidence TAS] [pmid 8839867]; go_function: electron transporter activity [goid 0005489] [evidence NR]; go_process: defense response [goid 0006952] [evidence TAS] [pmid 8839867]; go_process: electron transport [goid 0006118] [evidence IEA]; go_process: intracellular signaling cascade [goid 0007242] [evidence IEA]
